---

# Adult Neurogenesis in Peripheral Nervous System

Yisheng Liu<sup>\*a</sup> Xiaosong Gu<sup>a,b</sup>.

<sup>a</sup> Model Animal Research Center, Nanjing University, Nanjing, Jiangsu, China.

<sup>b</sup> Key Laboratory of Neuroregeneration, Ministry of Education and Jiangsu Province, Co-innovation Center of Neuroregeneration, Nantong University, Nantong, Jiangsu, China.

\*Correspondence: [liuys@nicemice.cn](mailto:liuys@nicemice.cn)

## Abstract

Although postnatal neurogenesis has been discovered in some regions of the peripheral nervous system (PNS), only indirect evidences indicated that some progenitors in the adult sciatic nerve and dorsal root ganglion (DRG) serve as a source of newly born sensory neurons. Here, we report the discovery of neurons and neuronal stem cells in the adult rat sciatic nerve. Lineage tracing detected a population of sciatic nerve neurons as progeny of adult neuronal stem cells. With the further finding of labeled DRG neurons in adult transgenic rats with local sciatic nerve staining, we propose a model of adult neurogenesis in the sciatic nerve in which neuronal stem cells in sciatic nerve mature as sensory neurons in adults along the sciatic nerve to DRG. This hypothesis provides a new way to understand sensory formation in adults. Those neuronal stem cells in the sciatic nerve may help to therapy of nerve trauma and disease in the future.

## Introduction

Neurogenesis occur in specific regions of the mammalian brain throughout life with critical roles in brain plasticity such as learning, memory and mood regulation (Berg et al., 2019). Postnatal peripheral nervous system neurogenesis has been discovered in mammalian parasympathetic ganglia of the head(Dyachuk et al., 2014; Espinosa-Medina et al., 2014) and the gut(Uesaka et al., 2015). This finding suggests that neurogenesis might also occur in the adult PNS, such as in the sciatic nerve and dorsal root ganglion (DRG).

However, confirming the in vivo existence of neuronal stem cells in these regions is challenging. In contrast to the extensive research of adult neurogenesis in the mammalian brain, we know very little about the adult neuronal progenitors in the PNS. Recent studies have revealed stem-like populations in DRG that displayed sphere-forming potential and multipotency in vitro, yet the in vivo presence of neuronal stem cells in the DRG has not been documented in any ultrastructural studies in adult mammals(Li et al., 2007; Nagoshi et al., 2008; Vidal et al., 2015). The sensory DRG neurons are derived from the thoracolumbar region of the trunk neural crest. The cervical region of those neural crest differentiate into large diameter neurons at first(Lawson and Biscoe, 1979). Late emigrating trunk neural crest give rise to boundary cap neural crest stem cells, a source of multipotent sensory specified stem cells(Radomska and Topilko, 2017). As a transient population, the embryonic neural crest quickly transfer from multipotent to restricted progenitors with limited capacity to self-renew before birth (Bronner and Simoes-Costa, 2016). In mammalian fetal and adult peripheral nerves and skin, neural

42 crest derivatives give rise to multiple derivatives in vitro (Gresset et al., 2015; Morrison  
43 et al., 1999; Wong et al., 2006). This finding suggests that a subset of the neural crest  
44 population in the sciatic nerve and skin maintain multipotency after embryonic  
45 development. But the identity of precursors to adult sciatic nerve and DRG neurons and  
46 how they maintain their multipotency during development from embryonic to adult  
47 mammals are unknown.

48 One major obstacle to studying the adult neurogenesis in PNS is a lack of methods  
49 to the identification of neuronal stem cells in vivo. Many studies focus on cell isolation  
50 or in vitro culture of adult sciatic nerve and DRG because of the lack of a more specific  
51 in vivo tool (Baggiolini et al., 2015; Morrison et al., 1999). We established a sciatic nerve  
52 crush model in adult rats. By whole-mount staining and optical imaging of the crushed  
53 sciatic nerve tissue for stathmin 2 (Stmn2, or Scg10) (Shin et al., 2014), we observed  
54 neurons and neuronal stem cells in adult rat sciatic nerve. As an intermediate filament  
55 protein in neuroepithelial precursor cells, Nestin is considered a hallmark of neural  
56 stem/progenitor cells (Dubois et al., 2006; Hockfield and McKay, 1985; Lendahl et al.,  
57 1990; Wiese et al., 2004). We characterized neuronal stem cells labeled by the  
58 Nestin-CreER<sup>T2</sup> rat line and Nestin-Cre rat line in the adult sciatic nerve but not in DRG  
59 with clonal lineage-tracing. In adult rats stained for the neuron marker Stmn2 and  
60 Peripherin (Escurat et al., 1990), the lineage-tracing neuronal stem cell and its progeny  
61 were temporally and spatially distributed along the sciatic nerve from the dermal nerve  
62 ending to the DRG, suggesting that adult neurogenesis in the DRG does not occur in situ  
63 but, rather, new cells migrate along the sciatic nerve. During embryonic development,  
64 the neural crest migrate from the neural tube to the DRG as sensory neurons and to the  
65 sciatic nerve and dermal nerve ending as multipotent cells (Baggiolini et al., 2015;  
66 Gresset et al., 2015; Morrison et al., 1999). Our study provides a new perspective that  
67 those multipotent cells will mature in the sciatic nerve and migrate from sciatic nerve to  
68 DRG as sensory neurons in adult.

## 69 Results

### 70 The Adult Sciatic Nerve Contains Neuronal Cell Bodies

71 To enable us to image deep within PNS structures, we used a clearing reagent called  
72 ScaleS that renders the rat DRG and sciatic nerve transparent, but completely preserves  
73 fluorescent signals from labeled cells (Hama et al., 2015). Optical clearing of tissue  
74 allowed us to identify neuronal cell bodies in the sciatic nerve. Three days after creating  
75 a 1mm sciatic nerve lesion in twenty adult rats for 30s crush by forceps, we used an  
76 Stmn2 antibody to identify regeneration projections of the damaged DRG neurons.  
77 Surprisingly, we observed neuron-like cells at the distal end of six rats sciatic nerve,  
78 though 14 other rats did not contain these cells (Fig. 1a). As mature Schwann cells  
79 generate Schwann spheres and pigment cells in crushed sciatic nerve in vitro and in vivo,  
80 the existence of the neuron-like cells may have been induced by injury (Takagi et al.,  
81 2011). To assess whether the neuron-like cells exist in undamaged nerves, we used the  
82 same optical clearing method on intact sciatic nerves of adult rats. We found that the  
83 neuron-like cells were also present in intact sciatic nerves in five of 25 control rats (Fig.

84

1b).

85

86

87

88

89

90

91

92

93

94

95

The unpredictable existence and location of those neuron-like cells in the sciatic nerve make those cells difficult to trace and identify. Delivery of adeno-associated virus (AAV) provides a noninvasive method for broad gene delivery to the nervous system (Foust et al., 2009). To label the neuron-like cells in vivo, we infected the sciatic nerves with engineered AAV2/9 and the hSYN and hEF1a promoter, to elicit stable expression of green fluorescent protein (GFP) in the cells. We detected the neuron projections in these infected neuron-like cells in vivo (Fig. 1c). Forty-six of 140 rats had these neuron-like cells in their sciatic nerves. Although only some of the neuron-like cells were stained, the expression of the neuron-specific marker NeuN (Mullen et al., 1992) indicated that part of those cells were indeed neurons (Fig. 1c). Together, this evidence indicates that there are neurons in adult rat sciatic nerve.

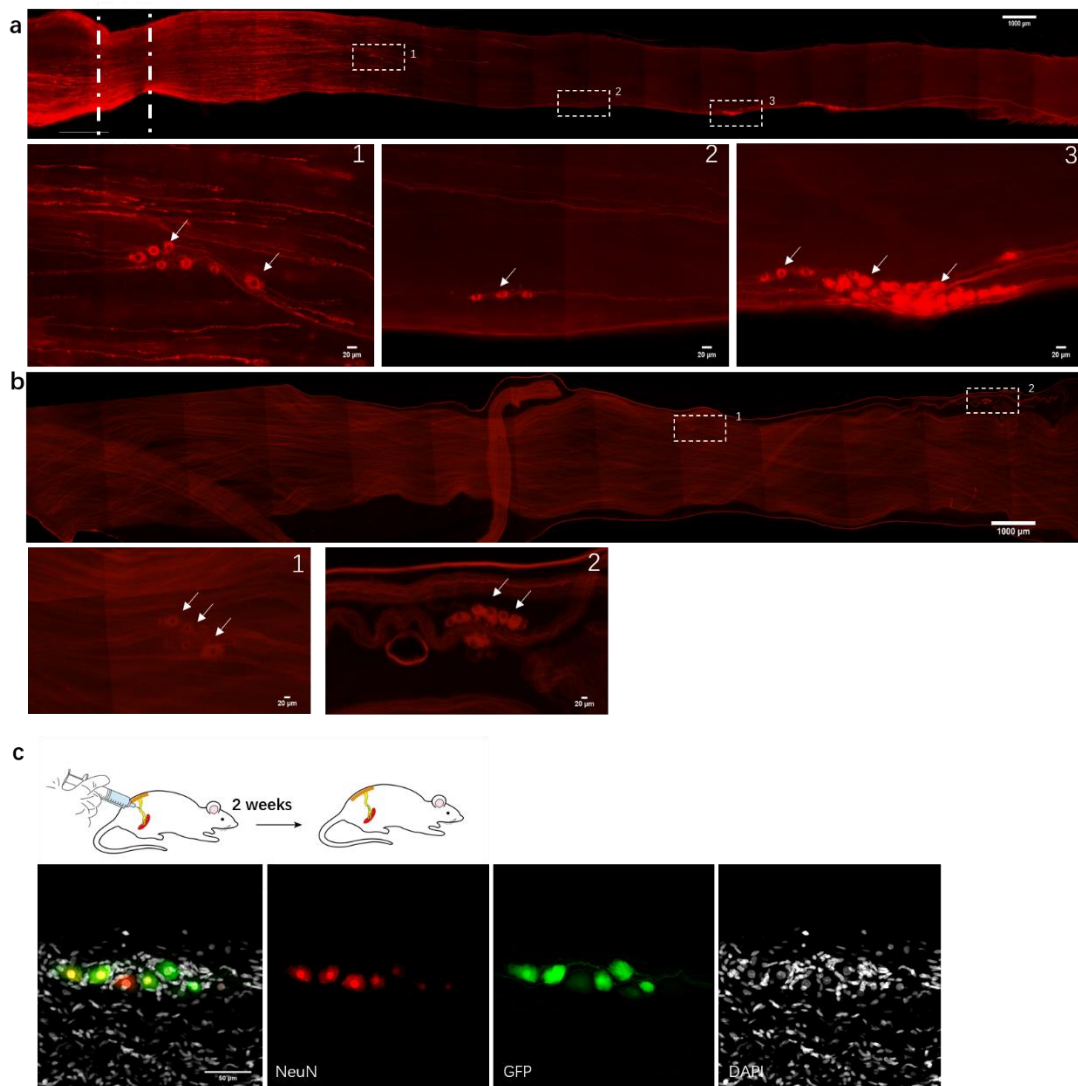

96

97

**Fig. 1 | Different methods used to identify neurons in vivo in the adult rat sciatic nerve.**

98

**a.** Neuron-like cells in the crushed sciatic nerve of an adult rat. Lower panels show

99

high-magnification images of the boxed regions in the upper panel. The sciatic nerve was

100

hyalinized using ScaleS and stained for Stmn2 (red). The image shows neuron-like cells in the

---

101 sciatic nerve. The white line indicates the crush site. (bar: upper =1000 $\mu$ m, lower=20 $\mu$ m)  
102 **b.** Neuron-like cells in the intact sciatic nerve of an adult rat. The nerve was hyalinized using  
103 ScaleS and stained for *Stmn2* (red). The image shows neuron-like cells in the sciatic nerve. (bar:  
104 upper =1000 $\mu$ m, lower=20 $\mu$ m)  
105 **c.** Neuron-like cells labeled by AAV2/9 virus in vivo. NeuN and DAPI staining of virus-marked  
106 cells in vivo. Immunofluorescence staining for NeuN (red) and DAPI (gray) in GFP  
107 (green)-labeled cells in adult rat sciatic nerves 2 weeks after injection of AAV2/9 virus.  
108 (bar=50 $\mu$ m)

## 109 Neuronal Stem Cells in Adult Sciatic Nerve

110 Because of the infrequent existence of the neurons in the sciatic nerves, we used an  
111 in vitro method to culture the sciatic nerve in a defined serum-free medium. We infected  
112 the adult rat sciatic nerve with AAV2/9 containing the hSYN and hEF1a promoter in  
113 vitro so that those cells stably expressed GFP, and observed labeled cells in sciatic nerves  
114 four to seven days later(Fig. 2a). For two weeks culture, sciatic nerves of 40 rats  
115 contained labeled cells while sciatic nerves of 170 rats were without. We then identified  
116 those cells by staining for peripherin, a marker of peripheral neurons (Fig. 2b).

117 Next, to prospectively identify the labeled cells enables us to directly examine their  
118 properties at the molecular level. We conducted single-cell sequencing after 2 weeks of  
119 in vitro culturing(Fig.2c). 114 cells were dissected from GFP-positive sciatic nerves in  
120 vitro and in vivo (9 cells were from in vivo nerves). 10 DRG neurons were used as a  
121 positive control. Unsupervised clustering analysis assessed the separation of DRG  
122 neurons, *Stmn2*<sup>+</sup> cells, and *Stmn2*<sup>-</sup> cells(Blondel et al., 2008). Cells were separated into  
123 four clusters by further unsupervised clustering analysis. Cluster 1 and 2 cells showed  
124 high expression of transcripts for *Egr2* (*Krox20*), *nestin*, and *Mpz* (protein 0), which are  
125 markers of migrating neural crest cells during the early fetal period(Dupin and Sommer,  
126 2012). Cluster 3 and 4 cells showed high expression of *Tac1* and *Tubb3*, which encode  
127 markers of mature neurons(Hokfelt et al., 2001; Jiang and Oblinger, 1992) (Fig.2d). As  
128 many cell-cycle genes were commonly expressed to varying degrees, this finding suggest  
129 that the labeled cells include neurons (some cells in cluster 4) and quiescent neuronal  
130 stem cells(some cells in cluster 1) that expressed low levels of cell-cycle genes, active  
131 neuronal stem cells(some cells in cluster 2,3) that expressed high levels of cell-cycle  
132 genes in the adult sciatic nerve.

133 We used a set of immunobiological markers and morphological criteria to identify  
134 and quantify the different cell types labeled by AAV2/9 in the sciatic nerve in vivo and in  
135 vitro. In both contexts, some of the cells exhibited radial glia-like morphology and  
136 expressed *Nestin* (Fig. 2e-f).

137 Together, these findings suggest that neuronal stem cells which we called  
138 multipotential sciatic nerve neural crest stem cells(snNCSCs) exist in the adult sciatic  
139 nerve in vitro and in vivo.

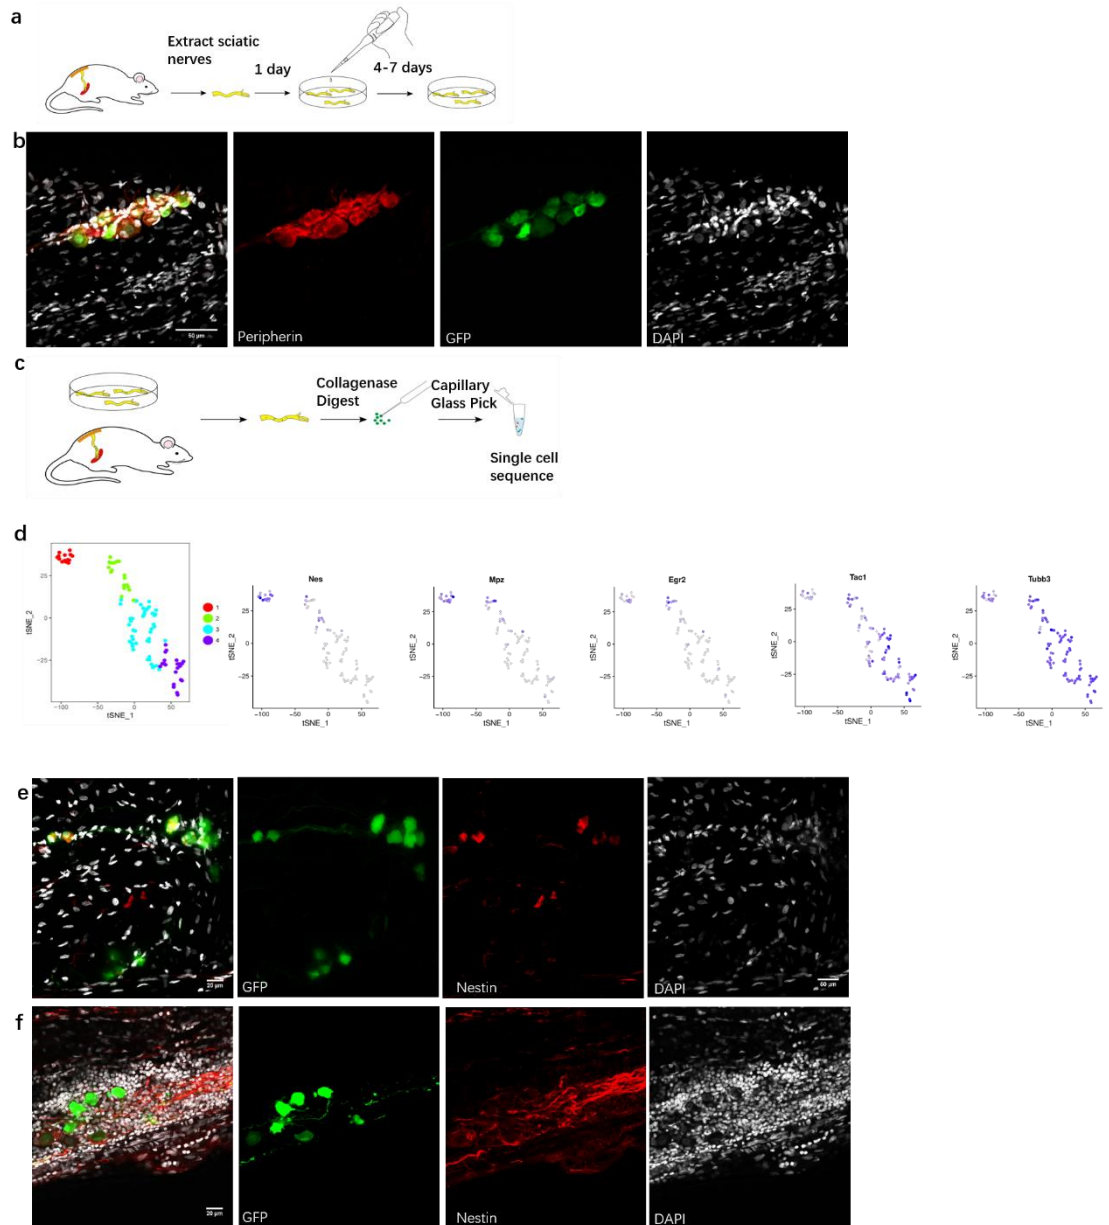

140

141

142 **Fig. 2 | Neuronal stem cells in sciatic nerves of adult rats.**

143 **a.** Sciatic nerve culture model. The sciatic nerves of adult rats were cultured in a defined  
144 serum-free medium.

145 **b.** Peripherin staining of virus-labeled cells in vitro. Immunofluorescence staining for peripherin  
146 (red) and DAPI (gray) in GFP (green)-labeled cells was performed in cultured adult rat sciatic  
147 nerves 2 weeks after injection of the AAV2/9 virus. (bar=50µm)

148 **c.** Model of single-cell sequencing of virus-labeled neuron-like cells.

149 **d.** t-SNE map representing the subcluster analysis of the 100 GFP+ cells that expressed high  
150 levels of *Stmn2*. The four colors represent four different clusters. Expression profile of neural  
151 crest differentiation related genes in the t-SNE map. Blue gradient represents the level of gene  
152 expression.

153 **e.** Stem cell marker of neuron-like cells in vitro. Immunofluorescence staining for Nestin (red) and

154 DAPI (gray) was performed in cultured adult rat sciatic nerves 2 weeks after injection of AAV2/9  
155 virus in vitro. (bar=20 $\mu$ m)  
156 **f.** As for (e), but in vivo, using adult rat sciatic nerves 2 weeks after injection of AAV2/9 virus.  
157 (bar=20 $\mu$ m)

## 158 Sciatic Nerve Neural Crest Stem Cells Differentiate 159 Gradually in Adult Sciatic Nerve

160  
161 To examine the cell fate of Nestin-positive cells in the adult rat sciatic nerve, we  
162 constructed a Nestin-CreER<sup>T2</sup> rat for sequential observation (Dubois et al., 2006). We  
163 analyzed recombination in situ using reporter rats carrying an Tdtomato transgene whose  
164 expression was dependent on Cre-mediated recombination.

165 At different time points after tamoxifen and EdU intraperitoneal injection, We used  
166 *stmn2* to identify and quantify cells labeled with Tdtomato in the sciatic nerves (Fig3a).  
167 The first two or three weeks, Tdtomato<sup>+</sup> cells were not co-labeled with *stmn2* but in the  
168 segments consisted of the *stmn2*<sup>+</sup> cells. Most of those cells are set aside in quiescence  
169 without co-labeled with EdU (Fig3b). At four or more weeks, part of Tdtomato<sup>+</sup> cells  
170 were co-labeled with *stmn2* and EdU. Some of the Tdtomato<sup>+</sup> *stmn2*<sup>-</sup> cells and  
171 Tdtomato<sup>-</sup> *stmn2*<sup>+</sup> cells both co-labeled with EdU indicated those cells not only able to  
172 be differentiation but also self-renew (Fig3c). It consist with our single cell sequencing  
173 result and indicated most of those cells are quiescent neuronal stem cells and progenitors.  
174 For a long term tamoxifen injection, all the *stmn2*<sup>+</sup> cells we detected are co-labeled with  
175 Tdtomato in 8 monthes old rats. This indicated those *stmn2*<sup>+</sup> cells are derived from the  
176 Tdtomato<sup>+</sup> cells.

177 All those together, we concluded that the snNCSCs will set aside in quiescence and  
178 gradually differentiate into progenitors and neurons in the adult sciatic nerves in vivo.

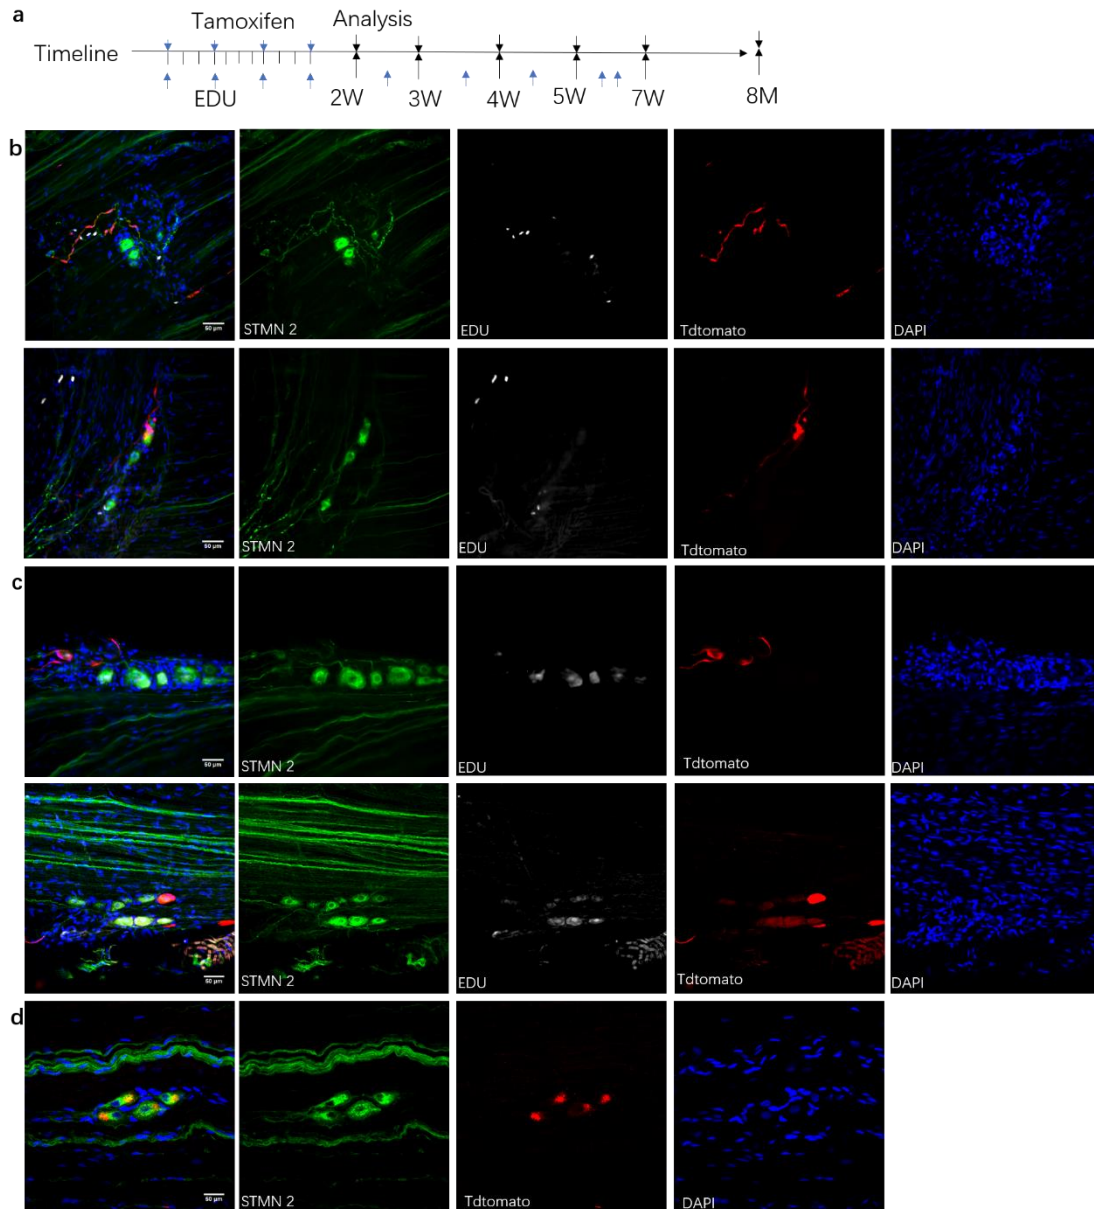

179

180 **Fig. 3 | Neuronal stem cells gradually development in adult sciatic nerve.**

181 **a.** Adult Nestin-CreER<sup>T2</sup>::Tdtomato rats were given injections of tamoxifen and EdU at different  
182 time points for clonal lineage-tracing analysis.

183 **b.** Confocal images of stmn2-labeled cells at 2 or 3 weeks after tamoxifen injection, but cells were  
184 not co-labeled with Tdtomato and EdU. (bar=50μm)

185 **c.** Confocal images of stmn2-labeled cells at 4 or 5 weeks after tamoxifen injection co-labeled  
186 with Tdtomato and EdU. (bar=50μm)

187 **d.** Confocal images of stmn2-labeled cells at 8 months after tamoxifen injection co-labeled with  
188 Tdtomato . (bar=50μm)

## 189 DRG Contains Neurons from Adult Sciatic Nerve

190 To investigate the in vivo differentiation potential and the final location of Nestin<sup>+</sup>  
191 cells and their progeny, we utilized a transgenic approach in rat using the Nestin-Cre

192 driver for labeling(Dubois et al., 2006) and performed mCherry staining of whole  
193 peripheral nerves and DRGs three weeks after tail vein injection of mCherry DIO (FLEX  
194 switch under Cre induction) AAV-PHP.S with hEF1a promoter virus in 12 nestin-cre<sup>+/+</sup>  
195 rats. We dissected the L4 or L5 DRG and sciatic nerve of those rats. Surprisingly, NeuN  
196 staining revealed mCherry<sup>+</sup> neurons in DRG of 3 rats (Fig. 4a). Next, we sacrificed rats 7  
197 weeks after tail vein injection of AAV-PHP.S virus. Nineteen of 20 successfully injected  
198 rats contained mCherry<sup>+</sup> neurons in their DRG(Fig. 4b).

199 To specifically assess the cell fate of the marked DRG cells, we injected the sciatic  
200 nerve of Nestin-Cre rats with hSYN-GFP DIO (FLEX switch under the induction of Cre)  
201 AAV-PHP.S virus, and sacrificed ten rats 3 weeks later. In 2 rats, GFP<sup>+</sup> cells were  
202 observed in the DRG and sciatic nerve ipsilateral to injection with virus, whereas no  
203 GFP-positive cells were observed on the contralateral side. We further characterized  
204 traced cells with markers for different categories of mature DRG neurons, including  
205 peptidergic sensory neurons, such as Plexin C1 and Calca-positive neurons(Usoskin et al.,  
206 2015)( Fig. 4c). In addition, co-labeled with Ssea1(Sieber-Blum, 1989) but not Nestin or  
207 Egr2 indicated the limited differentiation potential of mCherry<sup>+</sup> cells and newly born  
208 neurons in the DRG of mCherry DIO AAV-PHP.S-injected Nestin-Cre rats (Fig. 4d).  
209 Together, these findings indicate the possibility that neurons from the sciatic nerve  
210 migrate into the DRG as sensory neurons. The spatial distribution of the labeled neurons  
211 indicated a wave of sensory neuron migration from the sciatic nerve to the DRG in adult  
212 rats.



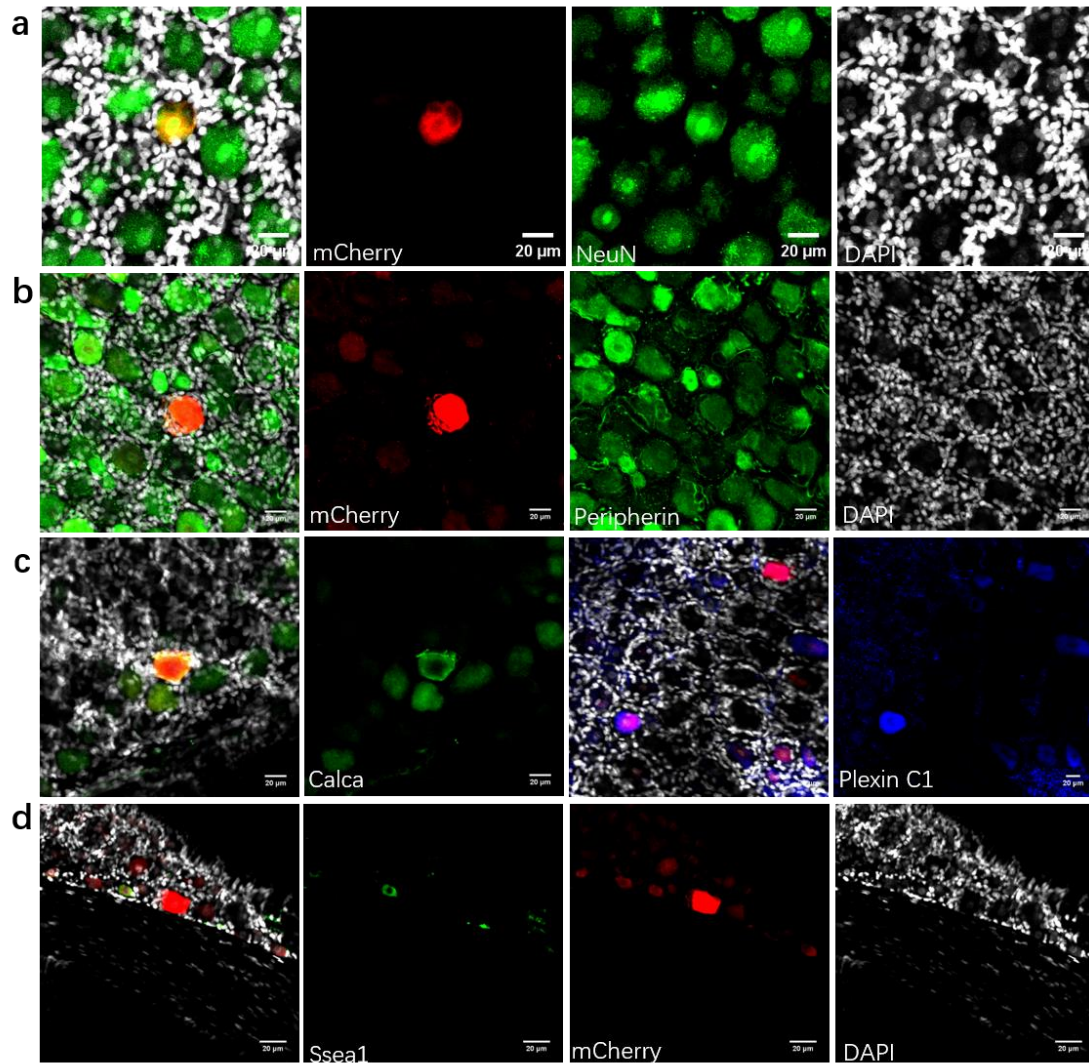

213

214 **Fig. 4 | Distribution of newborn neurons from the sciatic nerve in the adult DRG.**

215 **a.** mCherry<sup>+</sup> neurons in the DRG of Nestin-Cre<sup>+/+</sup> rats subjected to tail vein viral injection.  
216 Immunofluorescence staining for NeuN (green) and DAPI (gray) was performed in  
217 mCherry-marked cells (red) of the adult Nestin-Cre<sup>+/+</sup> rat DRG injected with AAV-PHP.S virus in  
218 vivo 3 weeks ago. (bar=20μm)

219 **b.** As for (b), but for 7 weeks., using peripherin (green) and DAPI (gray) to stain  
220 DRG.(bar=20μm)

221 **c.** mCherry-positive cells in the DRG. Immunofluorescence staining for DAPI (gray) and  
222 neuron-specific markers Calca (green) and Plexin C1 (blue) was performed in mCherry-labeled  
223 DRG cells (red) of the adult Nestin-Cre<sup>+/+</sup> rat after AAV-PHP.S virus injection in vivo. (bar=20μm)

224 **d.** Stem cell markers of viral-labeled cells in the DRG of Nestin-Cre<sup>+/+</sup> rats. Immunofluorescence  
225 staining for Ssea1 (green) and DAPI (gray) was performed in mCherry-labeled DRG cells (red) of  
226 the adult Nestin-Cre<sup>+/+</sup> rat after AAV-PHP.S virus injection. (bar=20μm)

227

## Discussion

228

Although some subpopulations of NCSCs with high plasticity and sphere-forming

229 capacity persist in the sciatic nerve and DRG during the late fetal stage to adulthood in  
230 vitro, it is technically challenging to demonstrate that post-migratory neural crest cells  
231 are maintain their multipotent properties and developmental plasticity in vivo(Bronner  
232 and Simoes-Costa, 2016; Parfejevs et al., 2018). Our discovery of neurons and neuronal  
233 stem cells in the adult mammalian sciatic nerve indicates that the nerve contains  
234 multipotent stem cells that differentiate into neurons. Our findings moreover indicate that  
235 sciatic nerve neurons will migrate into the DRG in adult.

236 As the existence and location of those cells are unpredictable for now in the adult  
237 sciatic nerve, we hypothesize that neural crest cells at the neural tube migrate to the  
238 sciatic nerve and dermis nerve ending in the skin, where they give rise to different neural  
239 crest derivatives and self-renewing cells before birth(Bronner and Simoes-Costa, 2016;  
240 Gresset et al., 2015; Morrison et al., 1999)(Fig. 5a); those self-renewing cells, snNCSCs,  
241 mature in the sciatic nerve and eventually migrate to the DRG in adult(Fig. 5b).  
242

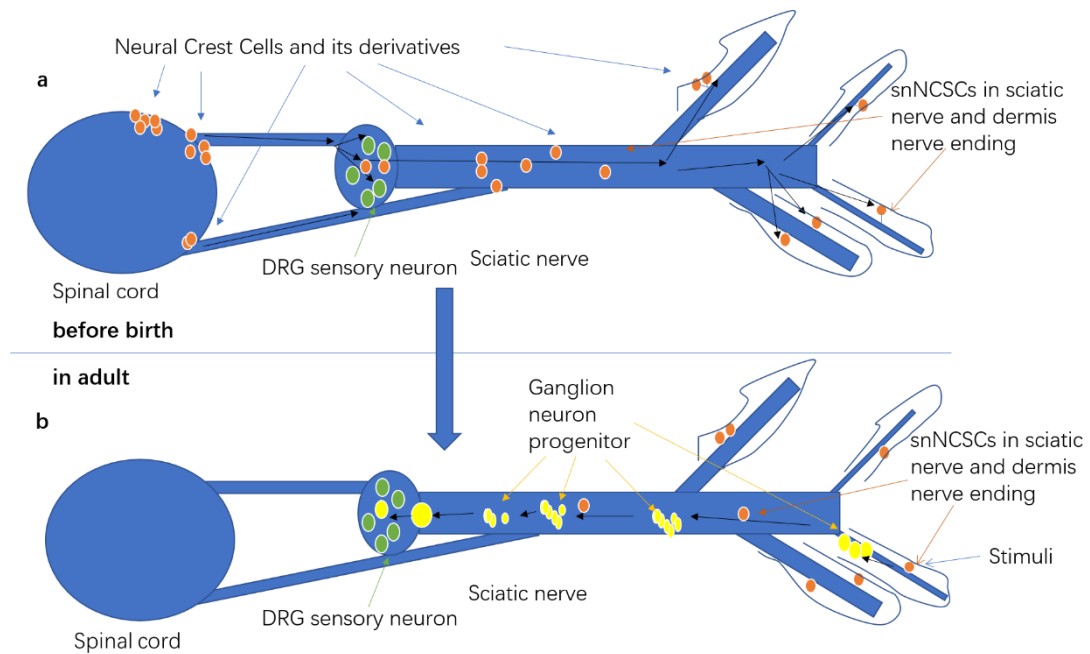

243

244 **Fig. 5 | Hypothesis of adult neurogenesis in the sciatic nerve.**

245 **a.** Neural crest cells migrate to the DRG and skin along the sciatic nerve before birth.

246 **b.** snNCSCs in the dermis nerve ending and sciatic nerve mature in the sciatic nerve and migrate  
247 to the DRG in adults.

248

249 In the crush model (Fig. 1a), the sciatic nerve presents a snapshot of adult  
250 neurogenesis process outlined in our hypothesis. Along the sciatic nerve from a location  
251 distal to the DRG, snNCSCs arranged in a segmental chain of cell groups develop larger  
252 cell bodies and undergo a reduction in number. Those segmental form and migration  
253 pattern are with same character as the embryonic neural crest(Szabo and Mayor, 2018).

254 In Nestin-CreER<sup>T2</sup> rats, those segmental chain comprise neuronal stem cells,  
255 progenitors and neurons. Most of those stem cells and progenitors are in quiescence and  
256 gradually development along the sciatic nerve.

257 In Nestin-Cre transgenic rats labeled with the virus via local sciatic nerve injection,  
258 we found labeled neurons in the DRG. Without finding of nestin<sup>+</sup> progenitor cells  
259 co-labeled with traced marker in the DRG of those virus injected rats further confirmed  
260 our hypothesis that sciatic nerve neurons migrate to the DRG in adult.

261 Our findings raise two major questions that require further study. First, we must  
262 determine the source of snNCSCs. NCSCs in fetal sciatic nerve were shown to have  
263 self-renewing ability in vivo and to maintain multipotency in vitro (Morrison et al., 1999).  
264 Before birth, boundary cup neural crest stem cell derivatives with multipotency migrate  
265 from the neural tube into the nerve roots of skin and the DRG (Gresset et al., 2015).  
266 Given the diversity of neural crest cell derivatives (Baggiolini et al., 2015), it would be  
267 difficult to determine the source of adult snNCSCs without new methods to track the  
268 trajectories of their development.

269 The second important question is what triggers the stem cells to differentiate. In  
270 postnatal parasympathetic ganglia of the head or gut, differentiation of Schwann cell  
271 precursors (SCPs) is a programmed organizational process that occurs at a defined time  
272 and place (Dyachuk et al., 2014; Espinosa-Medina et al., 2014; Uesaka et al., 2015). In  
273 adults, neural crest-derived cells show injury and stress responses, likely involving  
274 dedifferentiation and in vivo reprogramming to acquire a new cell fate (Parfejevs et al.,  
275 2018). In our 3-day sciatic nerve crush model, the rarity of NC-derived cells in some  
276 sciatic nerves indicated that injury and stress may not be the reason why those cells  
277 differentiate. On the basis of the observed unpredictable existence and location of those  
278 cells in adult sciatic nerve, the differentiation of snNCSCs does not appear to be a  
279 programmed organizational process that occurs during specific periods of adulthood.

280 Although it must be regarded cautiously until verified, we hypothesize that neuronal  
281 stem cells in the sciatic nerve are derived from self-renewing cells, which themselves are  
282 derived from the neural crest and persist in dermis nerve endings or a branch of the  
283 sciatic nerve. The maturation process of those cells is triggered by changes in the  
284 environment. These changes are similar to those brought about by an immunogen during  
285 the secondary immune response. Once an environmental change (such as the arrival of an  
286 immunogen) stimulates the dermis nerve ending or the branch of the sciatic nerve,  
287 snNCSCs are activated and stored in the trunk of the sciatic nerve. As mature neurons  
288 and snNCSCs in quiescent condition are both in the adult sciatic nerve as EdU staining  
289 experiment and single-cell sequencing indicated, the same environmental change will  
290 initiate a rapid sensory response. This hypothesis may help explain mammalian  
291 responses to environmental change and even drive a new understanding of the evolution  
292 of the mammalian sensory system.

293 Adult neural stem cells are attracting increased interest as potential candidates for  
294 cell transplantation therapy for nerve trauma and disease because they are present in  
295 tissue that can be harvested from the patient (Parfejevs et al., 2018; Radomska and  
296 Topilko, 2017). Moreover, skin stem cells contribute to skin regeneration and wound  
297 repair through cellular programs that can be hijacked by cancer cells (Ge and Fuchs, 2018;  
298 Mantyh, 2006; Nakada et al., 2011). Our snNCSCs migration model may therefore  
299 provide clues to cancer cell migration along the sciatic nerve, expanding knowledge  
300 about their role in hijacking the hematopoietic system via blood vessels and lymphatic

301 vessels (Crane et al., 2017). In the future, we hope this work will also facilitate  
302 transplantation of adult neuronal stem cells in the sciatic nerve using a method that  
303 simulates typical adult sensory reconstruction processes so that we can eventually realize  
304 functional sensory reconstruction. Furthermore, our observation of newly born sensory  
305 neurons may help elucidate the mechanisms of pain, touch, and other senses, and may  
306 one day enable adult sensory reconstruction and help overcome barriers to limb  
307 reconstruction.

## 308 **Methods**

### 309 **Animals**

310 Three rat lines were used for this study: Sprague-Dawley (SD), a transgenic Nestin  
311 reporter SD rat line that expresses Cre from the endogenous H11 locus, a transgenic  
312 Nestin reporter SD rat line that expresses CreER<sup>T2</sup> from the endogenous H11 locus and  
313 pCAG-loxP-3XSTOP-loxP-Tdtomato-WPRE-bGfpA from the endogenous ROSA26 locus.  
314 Male experimental and control rats were littermates housed together before the  
315 experiment. We produced Nestin-Cre and Nestin-CreER<sup>T2</sup> knock-in rats via the  
316 CRISPR/Cas9 system. First, a single guide RNA (sgRNA) targeting the H11 locus, the SD  
317 Nestin promoter-Cre-PA-Nestin Enhancer fragment, was inserted into the H11 locus of  
318 rats using CRISPR/Cas9 technology. The rat H11 locus (which is positioned between the  
319 Eif4enif1 and Drg1 genes) is ubiquitous, allowing the use of an exogenous promoter to  
320 drive higher expression when inserted at the locus. Second, Cas9, sgRNA, and the donor  
321 vector were co-injected into zygotes. We transferred the injected zygotes into the  
322 oviduct of pseudopregnant SD females. F0 rats were birthed 21–23 days after  
323 transplantation, and were identified by PCR and sequencing of tail DNA. Positive F0 rats  
324 were genotyped. Lastly, we crossbred positive F0 rats with SD rats to generate  
325 heterozygous rats. All animal procedures were performed in accordance with  
326 Institutional Animal Care guideline of Nantong University, and were ethically approved  
327 by the Administration Committee of Experimental Animals, Jiangsu Province, China.

### 328 **AAV Constructs**

329 Recombinant AAV2/9-hEF1a-GFP, AAV2/9-hSYN-GFP, AAV2/PHP.S-hEF1a-DIO-mCherry,  
330 and AAV2/PHP.S-hSYN-DIO-GFP vectors were packaged by co-transfection of HEK293  
331 with AAV9 or PHP.S capsid plasmid, helper plasmid, and the corresponding shuttle  
332 plasmid(Shanghai Taitool Bioscience Co. Ltd). Virus was collected from each specimen 3  
333 days after transfection and purified with iodixanol discontinuous density  
334 ultracentrifugation(Shanghai Taitool Bioscience Co. Ltd). The buffer viral solution was  
335 exchanged with phosphate-buffered saline (PBS) plus 5% glycerol using an Amicon  
336 ultra-15 spin ultrafiltration (Millipore). Genome copies of final viral solutions were  
337 determined by qPCR using primers detecting WPRE and the shuttle plasmid as a  
338 standard. The virus titers were approximately 2.50E+13.

### 339 **Scales and Immunohistology**

340 The transparency procedure was the same as described in other studies that used

341 ScaleS. Briefly, the epineural sheath must first be peeled away from the sciatic nerve  
342 sample. The permeability of a sample was enhanced by incubation for 12 h in ScaleS0  
343 solution (20% sorbitol, 5% glycerol, 1 mM methyl- $\beta$ -cyclodextrin, 1 mM  $\gamma$ -cyclodextrin, 1%  
344 N-acetyl-L-hydroxyproline, and 3% DMSO). Second, the permeable (adapted) sample  
345 was incubated sequentially in ScaleA2 (10% glycerol, 4 M urea, 0.1% Triton X-100 for 36  
346 hr), ScaleB4(0) (8 M urea for 24 hr), and ScaleA2 (for 12 hr) for  
347 permeabilization/clearing. These urea-containing and salt-free ScaleS solutions  
348 gradually clear the sample. Then, after descaling with PBS(-) wash for at least 6 hr, the  
349 sample was incubated for 36 hours with a fluorescence-labeled primary antibody (Ab)  
350 (direct IHC) or a primary Ab and then a fluorescence-labeled secondary Ab (indirect IHC)  
351 in an AbScale solution (PBS[-] solution containing 0.33 M urea and 0.1–0.5% Triton  
352 X-100). Before refixation with 4% PFA, we applied an AbScale rinse solution to the  
353 sample twice, for 2 h each time (0.1 $\times$  PBS[-] solution containing 2.5% BSA, 0.05% [w/v]  
354 Tween-20). Finally, the immunostained sample was optically cleared by incubation in  
355 ScaleS4 for more than 16 h (40% sorbitol, 10% glycerol, 4 M urea, and 0.2% Triton  
356 X-100). The following antibodies were used: Stmn2 rabbit 1:200 (ProteinTech  
357 10586-1-AP), NeuN mouse 1:200 (Millipore [clone GA5] MAB377), GFP chicken 1:200  
358 (Abcam ab13970), peripherin chicken 1:200 (Aves PER), nestin chicken 1:500 (Aves NES),  
359 nestin mouse 1:500 (Chemicon MAB353), CGRP goat 1:200 (Abcam ab36001), plexin C1  
360 mouse 1:500 (R&D Systems AF5375), SSEA-1 mouse 1:200 (Millipore [clone MC-480]  
361 MAB4301), mCherry chicken 1:200 (Novus NBP2-25158). All the fluorescence-labeled  
362 secondary antibodies were purchased from Invitrogen (1:400).

### 363 EdU and tamoxifen injection and labeling

364 A stock solution of 10 mg/ml EdU (Invitrogen, A10044) was prepared in normal saline  
365 solution (0.9%). A stock solution of 55 mg/ml tamoxifen(Sigma, T5648) was prepared in  
366 a 5:1 solution of corn oil:ethanol at 37°C in water bath kettle with occasional vortexing  
367 overnight. EdU (10 mg/kg) was injected in Nestin-CreER<sup>T2</sup> rats(6-week old, 200g) with  
368 tamoxifen injection(55mg/kg) at the time points showed in the Fig3a. After secondary  
369 antibody staining, EdU staining was performed according to manufacturer's guidelines  
370 (Click-iT EdU Alexa Fluor 647 Imaging Kit, Invitrogen).

### 371 Rat Sciatic Nerve Culture Preparation and Treatment

372 We cultured sciatic nerves from adult 6- to 8-week-old SD rats in 10 cm plates (Corning)  
373 coated with poly-D-lysine (Sigma) and laminin (Sigma). The sciatic nerve was cut from  
374 below the DRG (omitting all DRG tissue) to the nerve ending. We carefully peeled away  
375 the epineural sheath in cold PBS. The collected sciatic nerves were plated as a line at a  
376 density of approximately eight sciatic nerves per dish and kept for 20 min at 37°C (make  
377 sure it fixed on the plates), and a Neurobasal medium (Invitrogen) supplemented with 2%  
378 (vol/vol) B27 (Invitrogen) and 25 ng/mL nerve growth factor (Sigma) was added.  
379 Cultured sciatic nerves were maintained for 1 day prior to injection. The culture medium  
380 was discarded before the injection. The virus (20  $\mu$ l/8 nerves, with virus titers of  
381 approximately 2.50E+13) was dropped slowly and uniformly onto the sciatic nerve and  
382 then incubated for 2 h before adding the culture medium(carefully ensuring that the

383 sciatic nerve did not dry out). Then, the sciatic nerve was cultured for 1–2 weeks before  
384 observation to allow for GFP expression from the sciatic nerve, where the cell bodies  
385 were placed. For more than one month cultures, the medium was changed every 5 days.  
386 We examined neurons using a fluorescence microscope.

## 387 Animal Surgery

388 For the sciatic nerve lesion experiment, the adult rats (8–10 weeks old) were  
389 anesthetized by intraperitoneal injection with 85 mg trichloroacetaldehyde  
390 monohydrate, 42 mg magnesium sulfate, and 17 mg sodium pentobarbital. We exposed  
391 sciatic nerve at the sciatic notch by making a small incision. The nerve was then crushed  
392 at the same position for 30s under the same pressure by a ultra-fine hemostatic forceps,  
393 and the crush site was marked with a size 10-0 nylon epineural suture. For the control  
394 rats (8–10 weeks old), the sciatic nerve was exposed but left uninjured. After surgery,  
395 the wound was closed, and the rats were allowed to recover for two hour.

396 For the sciatic nerve AAV injection, we anesthetized the adult rats (6–8 weeks old,  
397 normal rats and 6 weeks old, Nestin-Cre rats) with an intraperitoneal injection of  
398 complex narcotics (85 mg trichloroacetaldehyde monohydrate, 42 mg magnesium  
399 sulfate, and 17 mg sodium pentobarbital) and carefully opened the skin and muscle and  
400 to expose the sciatic nerve. Then 10 cm capillary glass tubes (Sutter Instrument, Novato,  
401 CA) were pulled using a micropipette puller (model 720, David KOPF Instruments,  
402 Tujunga, CA). The tips of the pulled tubes were pinched with forceps to create pipettes  
403 with an external diameter of approximately 10  $\mu\text{m}$ . A 2.5  $\mu\text{l}$  volume of AAV2/9 (virus  
404 titers were approximately 2.50E+13) was gradually injected into the sciatic nerve with  
405 one pump of a microsyringe pump at a rate of 1  $\mu\text{l}/\text{min}$  (Stoelting Instruments). The  
406 needle tip was inserted into the epineural sheath, and the drops caused it to plump up.  
407 After three injections at three different sites along the sciatic nerve, the wound was  
408 closed, and the rats were allowed to recover for two hour.

409 For the tail AAV injection, we placed the 3-week-old rats in a restraint device. The tail  
410 was stabilized between the investigator's thumb and forefinger. To soften the skin, the  
411 tail was prepared in 40°C water for 5 min and then sterilized by 70% ethanol. The  
412 injection started at the distal part of the tail with an insulin syringe. With the tail under  
413 tension, the needle was inserted approximately parallel to the vein at a depth of at least  
414 3 mm. A 30  $\mu\text{l}$  solution of AAV-PHP.S (the virus titers were approximately 2.50E+13)  
415 mixed into 150  $\mu\text{l}$  PBS was slowly injected over 3 min. After the vein blanched, the  
416 needle was kept in position for 1 min. The rats were allowed to recover for two hour  
417 and then returned to their home cages.

## 418 Preparation of Individual Cells From Adult Rat Sciatic Nerve

419 We conducted single cell sequencing experiments on SD rats subjected to hSYN-GFP  
420 AAV2/9 and AAV2/9-hEF1a-GFP virus sciatic nerve injection in vivo and in vitro. The rats  
421 were euthanized by cervical dislocation, and the sciatic nerve was immediately  
422 immersed in ice-cold Dulbecco's Phosphate-Buffered Saline (DPBS, Corning). The  
423 dissected sciatic nerve was cut from the distal end of the DRG to the end of the sciatic  
424 nerve (leaving out the DRG) and we carefully peeled away the epineural sheath in cold

425 PBS. Collected sciatic nerves were cut into pieces under a fluorescence microscope. The  
426 GFP<sup>+</sup> piece was collected and incubated in Hibernate A (BrainBits) containing papain  
427 (100 U; Sigma) at 37°C for 2 h with intermittent flicking. After removing enzymes, the  
428 collected pieces were trypsinized for 20 min at 37°C. The tissue was triturated into an  
429 individual cell suspension using a 1 ml pipette. We removed the trypsinase and cellular  
430 debris with three rounds of mild centrifugation at 1000 ×g and a Hibernate A minus Ca<sup>2+</sup>  
431 and Mg<sup>2+</sup> wash (BrainBits). The individual cell suspension was plated into a glass-bottom  
432 plate and collected using glass pipettes under a fluorescence microscope. The glass tip  
433 was broken off and left in each PCR tube containing lysis buffer (Vazyme Biotech) with  
434 water (2.4 μl), RNase-free DNase (0.2 μl) and murine origin RNase inhibitor (0.25 μl).

### 435 Library Preparation, Clustering and Sequencing

436 We used the Vazyme method, followed by cDNA amplification as described below.  
437 Whole transcriptome amplification was performed using the Discover-scTM WTA Kit V2  
438 (Vazyme, N711). First, 124 active cells were isolated and transferred into a lysis buffer.  
439 Then, mRNA was copied into first-strand cDNA using Discover-sc Reverse Transcriptase  
440 and oligo dT primer. At the same time, we added a special adapter sequence to the 3'  
441 end of the first-strand cDNA. Full-length cDNA enrichment was performed by PCR, and  
442 the products were purified by VAHTSTM DNA Clean Beads (Vazyme, N411). Next, we  
443 performed quality control using the WTA cDNA. The cDNA concentration was measured  
444 using a Qubit DNA Assay Kit in a Qubit 3.0 Fluorometer (Life Technologies, CA, USA).  
445 DNA fragment size was tested using an Agilent Bioanalyzer 2100 system (Agilent  
446 Technologies, CA, USA). A total of 1 ng of qualified WTA cDNA product per sample was  
447 used as input material for the library preparation.

448 We generated sequencing libraries using the TruePrep DNA Library Prep Kit V2 for  
449 Illumina (Vazyme, TD503), following the manufacturer's recommendations. First, cDNA  
450 was randomly fragmented by the Tn5 transposome at 55°C for 10 min at the same time  
451 as a sequencing adapter was added to the 3' adenosine on the fragment. After  
452 tagmentation, the stop buffer was added directly into the reaction to end tagmentation.  
453 PCR was performed, and the products were purified with VAHTSTM DNA Clean Beads  
454 (Vazyme, N411). We conducted preliminary quantification of the library concentration  
455 using a Qubit DNA Assay Kit in Qubit 3.0. Insert size was assessed using the Agilent  
456 Bioanalyzer 2100 system, and if the insert size was consistent with expectations, it was  
457 more accurately quantified using qPCR with the Step One Plus Real-Time PCR system  
458 (ABI, USA).

459 We identified the neuron-like cells via *Stmn2* expression. We identified 94 *Stmn2*<sup>+</sup> cells  
460 in vitro and six *Stmn2*<sup>+</sup> cells in vivo using qPCR before sequencing. 14 *Stmn2*<sup>-</sup> cells were  
461 identified as negative control. 10 DRG neurons were identified as positive control.

462 Clustering of the index-coded samples was performed on a cBot Cluster Generation  
463 System (Illumina) according to the manufacturer's instructions. After cluster generation,  
464 the library preparations were sequenced on an Illumina HiSeq X Ten platform with a 150  
465 bp paired-end module.

### 466 Bioinformatic Analysis

---

467 Samples were then normalized by down sampling to a minimum number of 124  
468 transcripts per cell for the clustering analyses or a minimum of 100 transcripts per cell  
469 for differential gene expression analyses. Cells with fewer transcripts were excluded  
470 from the analyses. The modularity optimization technique SLM was used for  
471 unsupervised cell clustering. We used t-SNE to place cells with similar local  
472 neighborhoods in high-dimensional space together (McDavid et al., 2013).

## 473 Data availability

474 The 124 single-cell sequencing data (sample gene expression in FPKM) is available on  
475 Dryad (<https://doi.org/10.5061/dryad.xgxd254f6>) for the bioinformatic analysis.

## 476 Acknowledgements

477 I would like to thank H. Wang for providing the Nestin-Cre rats; F. Liu for helping with  
478 microscopes; X. Li for helping with the imaging of sciatic nerve; S. Zhou, I. Zhao, J. Qin, P.  
479 Li, J. Li, P. R. Williams for helping with sciatic nerve crush and injections; C. Zhou for  
480 helping with histology; Z. Wei and C. Li for helping with single-cell sequencing. L. Cai for  
481 helping with the design of the sketch map. This study is grateful for support from  
482 National Natural Science Foundation of China (Grant No. 31730031). I apologize that all  
483 relevant publications could not be cited.

484

## 485 References

- 486 Baggiolini, A., Varum, S., Mateos, J.M., Bettosini, D., John, N., Bonalli, M., Ziegler, U., Dimou,  
487 L., Clevers, H., Furrer, R., *et al.* (2015). Premigratory and migratory neural crest cells are  
488 multipotent in vivo. *Cell Stem Cell* *16*, 314-322.
- 489 Berg, D.A., Su, Y., Jimenez-Cyrus, D., Patel, A., Huang, N., Morizet, D., Lee, S., Shah, R.,  
490 Ringeling, F.R., Jain, R., *et al.* (2019). A Common Embryonic Origin of Stem Cells Drives  
491 Developmental and Adult Neurogenesis. *Cell*.
- 492 Blondel, V.D., Guillaume, J.L., Lambiotte, R., and Lefebvre, E. (2008). Fast unfolding of  
493 communities in large networks. *J Stat Mech-Theory E*.
- 494 Bronner, M.E., and Simoes-Costa, M. (2016). The Neural Crest Migrating into the Twenty-First  
495 Century. *Curr Top Dev Biol* *116*, 115-134.
- 496 Crane, G.M., Jeffery, E., and Morrison, S.J. (2017). Adult haematopoietic stem cell niches. *Nat*



- 
- 497 Rev Immunol *17*, 573-590.
- 498 Dubois, N.C., Hofmann, D., Kaloulis, K., Bishop, J.M., and Trumpp, A. (2006). Nestin-Cre  
499 transgenic mouse line Nes-Cre1 mediates highly efficient Cre/loxP mediated recombination in  
500 the nervous system, kidney, and somite-derived tissues. *Genesis* *44*, 355-360.
- 501 Dupin, E., and Sommer, L. (2012). Neural crest progenitors and stem cells: from early  
502 development to adulthood. *Dev Biol* *366*, 83-95.
- 503 Dyachuk, V., Furlan, A., Shahidi, M.K., Giovenco, M., Kaukua, N., Konstantinidou, C., Pachnis,  
504 V., Memic, F., Marklund, U., Muller, T., *et al.* (2014). Neurodevelopment. Parasympathetic  
505 neurons originate from nerve-associated peripheral glial progenitors. *Science* *345*, 82-87.
- 506 Escurat, M., Djabali, K., Gumpel, M., Gros, F., and Portier, M.M. (1990). Differential  
507 expression of two neuronal intermediate-filament proteins, peripherin and the  
508 low-molecular-mass neurofilament protein (NF-L), during the development of the rat. *J*  
509 *Neurosci* *10*, 764-784.
- 510 Espinosa-Medina, I., Outin, E., Picard, C.A., Chettouh, Z., Dymecki, S., Consalez, G.G.,  
511 Coppola, E., and Brunet, J.F. (2014). Neurodevelopment. Parasympathetic ganglia derive  
512 from Schwann cell precursors. *Science* *345*, 87-90.
- 513 Foust, K.D., Nurre, E., Montgomery, C.L., Hernandez, A., Chan, C.M., and Kaspar, B.K.  
514 (2009). Intravascular AAV9 preferentially targets neonatal neurons and adult astrocytes. *Nat*  
515 *Biotechnol* *27*, 59-65.
- 516 Ge, Y., and Fuchs, E. (2018). Stretching the limits: from homeostasis to stem cell plasticity in  
517 wound healing and cancer. *Nat Rev Genet* *19*, 311-325.
- 518 Gresset, A., Couplier, F., Gerschenfeld, G., Jourdon, A., Matesic, G., Richard, L., Vallat, J.M.,

- 
- 519 Charnay, P., and Topilko, P. (2015). Boundary Caps Give Rise to Neurogenic Stem Cells and  
520 Terminal Glia in the Skin. *Stem Cell Reports* *5*, 278-290.
- 521 Hama, H., Hioki, H., Namiki, K., Hoshida, T., Kurokawa, H., Ishidate, F., Kaneko, T., Akagi, T.,  
522 Saito, T., Saïdo, T., *et al.* (2015). ScaleS: an optical clearing palette for biological imaging. *Nat*  
523 *Neurosci* *18*, 1518-1529.
- 524 Hockfield, S., and McKay, R.D. (1985). Identification of major cell classes in the developing  
525 mammalian nervous system. *J Neurosci* *5*, 3310-3328.
- 526 Hokfelt, T., Pernow, B., and Wahren, J. (2001). Substance P: a pioneer amongst  
527 neuropeptides. *J Intern Med* *249*, 27-40.
- 528 Jiang, Y.Q., and Oblinger, M.M. (1992). Differential regulation of beta III and other tubulin  
529 genes during peripheral and central neuron development. *J Cell Sci* *103 (Pt 3)*, 643-651.
- 530 Lawson, S.N., and Biscoe, T.J. (1979). Development of mouse dorsal root ganglia: an  
531 autoradiographic and quantitative study. *J Neurocytol* *8*, 265-274.
- 532 Lendahl, U., Zimmerman, L.B., and McKay, R.D. (1990). CNS stem cells express a new class  
533 of intermediate filament protein. *Cell* *60*, 585-595.
- 534 Li, H.Y., Say, E.H., and Zhou, X.F. (2007). Isolation and characterization of neural crest  
535 progenitors from adult dorsal root ganglia. *Stem Cells* *25*, 2053-2065.
- 536 Mantyh, P.W. (2006). Cancer pain and its impact on diagnosis, survival and quality of life. *Nat*  
537 *Rev Neurosci* *7*, 797-809.
- 538 McDavid, A., Finak, G., Chattopadhyay, P.K., Dominguez, M., Lamoreaux, L., Ma, S.S.,  
539 Roederer, M., and Gottardo, R. (2013). Data exploration, quality control and testing in  
540 single-cell qPCR-based gene expression experiments. *Bioinformatics* *29*, 461-467.

- 
- 541 Morrison, S.J., White, P.M., Zock, C., and Anderson, D.J. (1999). Prospective identification,  
542 isolation by flow cytometry, and in vivo self-renewal of multipotent mammalian neural crest  
543 stem cells. *Cell* *96*, 737-749.
- 544 Mullen, R.J., Buck, C.R., and Smith, A.M. (1992). NeuN, a neuronal specific nuclear protein in  
545 vertebrates. *Development* *116*, 201-211.
- 546 Nagoshi, N., Shibata, S., Kubota, Y., Nakamura, M., Nagai, Y., Satoh, E., Morikawa, S., Okada,  
547 Y., Mabuchi, Y., Kato, H., *et al.* (2008). Ontogeny and multipotency of neural crest-derived  
548 stem cells in mouse bone marrow, dorsal root ganglia, and whisker pad. *Cell Stem Cell* *2*,  
549 392-403.
- 550 Nakada, D., Levi, B.P., and Morrison, S.J. (2011). Integrating physiological regulation with  
551 stem cell and tissue homeostasis. *Neuron* *70*, 703-718.
- 552 Parfejevs, V., Antunes, A.T., and Sommer, L. (2018). Injury and stress responses of adult  
553 neural crest-derived cells. *Dev Biol*.
- 554 Radomska, K.J., and Topilko, P. (2017). Boundary cap cells in development and disease. *Curr*  
555 *Opin Neurobiol* *47*, 209-215.
- 556 Shin, J.E., Geisler, S., and DiAntonio, A. (2014). Dynamic regulation of SCG10 in regenerating  
557 axons after injury. *Exp Neurol* *252*, 1-11.
- 558 Sieber-Blum, M. (1989). SSEA-1 is a specific marker for the spinal sensory neuron lineage in  
559 the quail embryo and in neural crest cell cultures. *Dev Biol* *134*, 362-375.
- 560 Szabo, A., and Mayor, R. (2018). Mechanisms of Neural Crest Migration. *Annu Rev Genet* *52*,  
561 43-63.
- 562 Takagi, T., Ishii, K., Shibata, S., Yasuda, A., Sato, M., Nagoshi, N., Saito, H., Okano, H.J.,

---

563 Toyama, Y., Okano, H., *et al.* (2011). Schwann-spheres derived from injured peripheral nerves  
564 in adult mice--their in vitro characterization and therapeutic potential. *PLoS One* *6*, e21497.

565 Uesaka, T., Nagashimada, M., and Enomoto, H. (2015). Neuronal Differentiation in Schwann  
566 Cell Lineage Underlies Postnatal Neurogenesis in the Enteric Nervous System. *J Neurosci* *35*,  
567 9879-9888.

568 Usoskin, D., Furlan, A., Islam, S., Abdo, H., Lonnerberg, P., Lou, D., Hjerling-Leffler, J.,  
569 Haegstrom, J., Kharchenko, O., Kharchenko, P.V., *et al.* (2015). Unbiased classification of  
570 sensory neuron types by large-scale single-cell RNA sequencing. *Nat Neurosci* *18*, 145-153.

571 Vidal, M., Maniglier, M., Deboux, C., Bachelin, C., Zujovic, V., and Baron-Van Evercooren, A.  
572 (2015). Adult DRG Stem/Progenitor Cells Generate Pericytes in the Presence of Central  
573 Nervous System (CNS) Developmental Cues, and Schwann Cells in Response to CNS  
574 Demyelination. *Stem Cells* *33*, 2011-2024.

575 Wiese, C., Rolletschek, A., Kania, G., Blyszczuk, P., Tarasov, K.V., Tarasova, Y., Wersto, R.P.,  
576 Boheler, K.R., and Wobus, A.M. (2004). Nestin expression--a property of multi-lineage  
577 progenitor cells? *Cell Mol Life Sci* *61*, 2510-2522.

578 Wong, C.E., Paratore, C., Dours-Zimmermann, M.T., Rochat, A., Pietri, T., Suter, U.,  
579 Zimmermann, D.R., Dufour, S., Thiery, J.P., Meijer, D., *et al.* (2006). Neural crest-derived cells  
580 with stem cell features can be traced back to multiple lineages in the adult skin. *J Cell Biol* *175*,  
581 1005-1015.

582

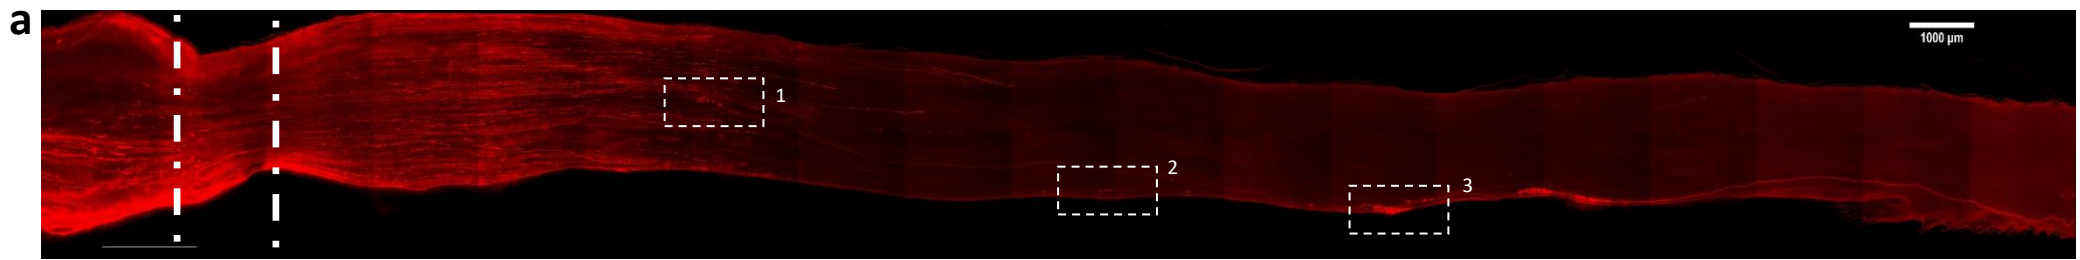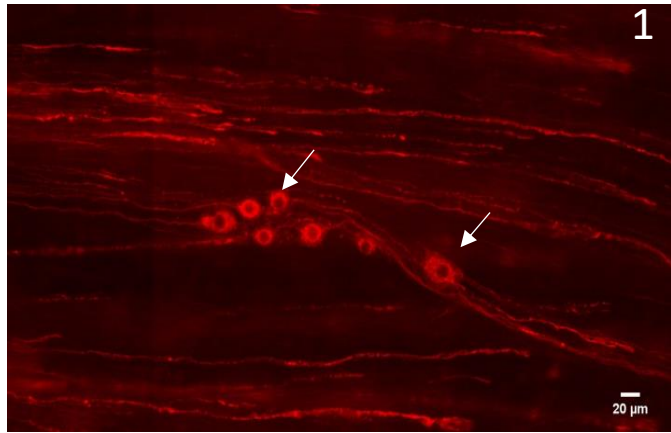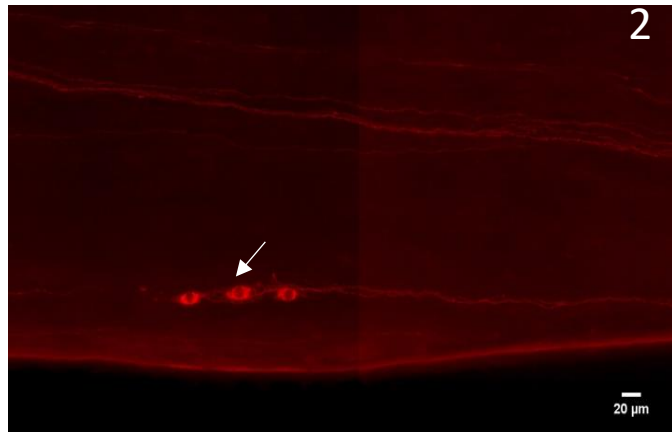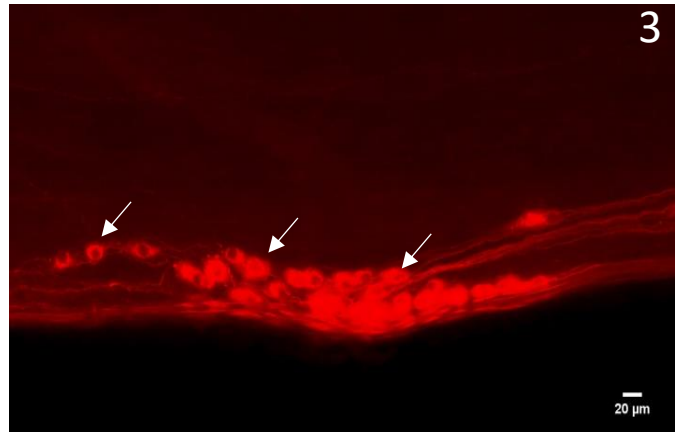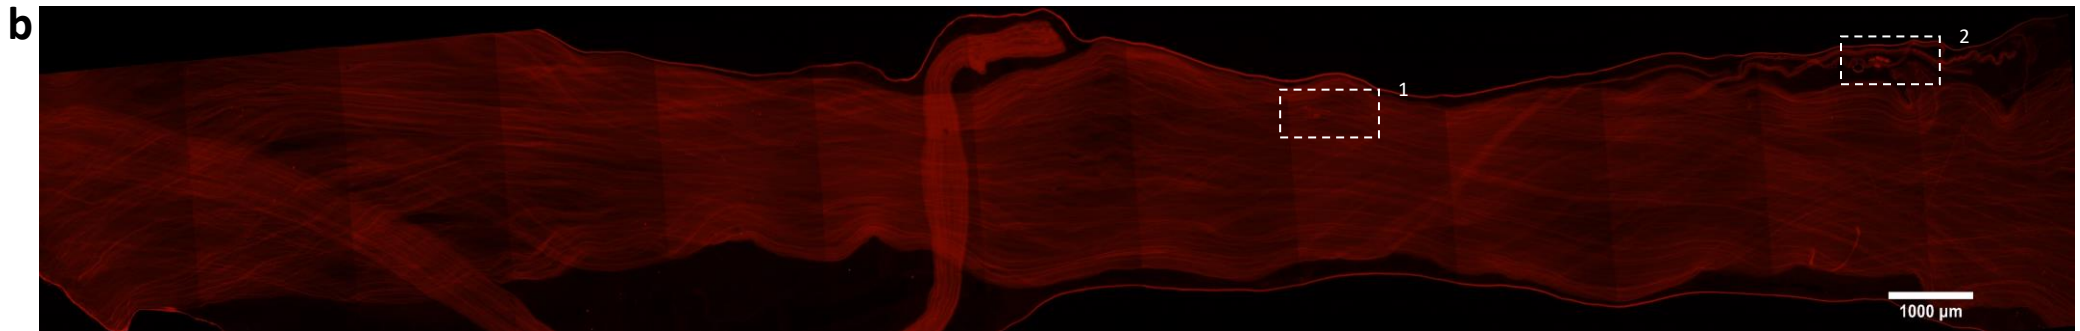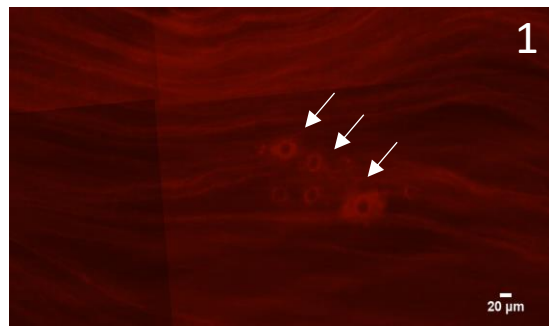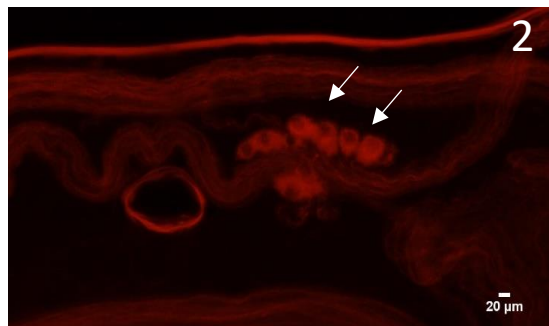

**c**

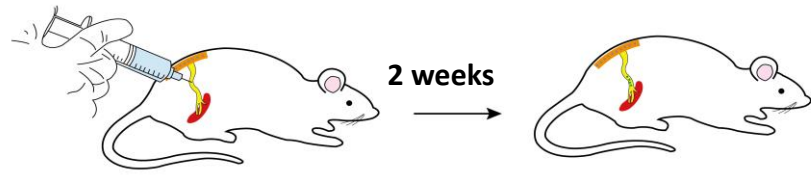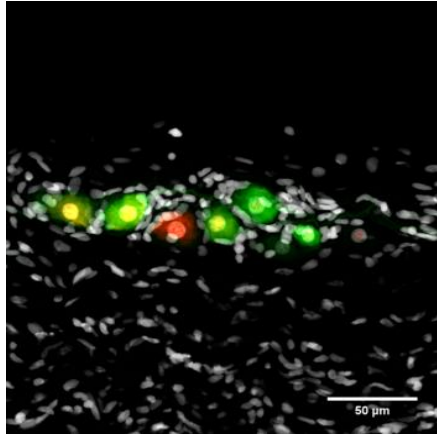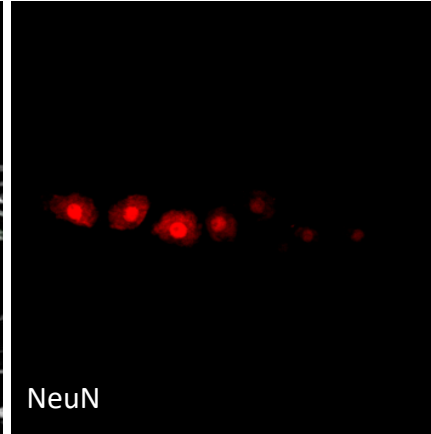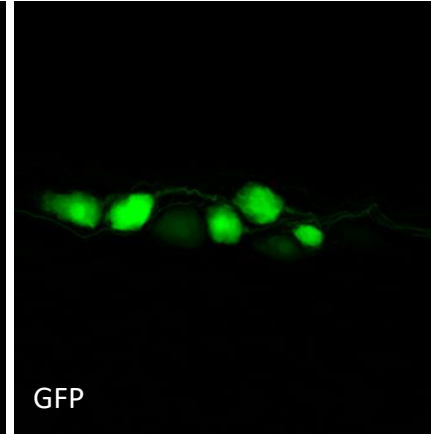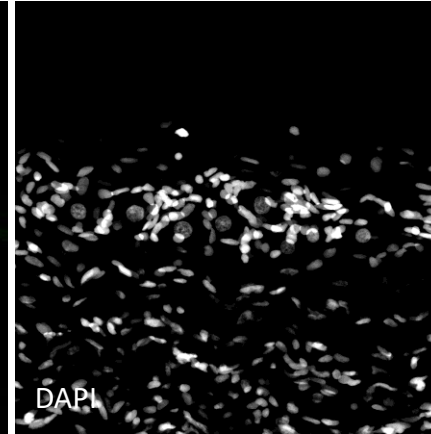

- **Fig. 1 | Different methods used to identify neurons in vivo in the adult rat sciatic nerve.**
- **a.** Neuron-like cells in the crushed sciatic nerve of an adult rat. Lower panels show high-magnification images of the boxed regions in the upper panel. The sciatic nerve was hyalinized using ScaleS and stained for Stmn2 (red). The image shows neuron-like cells in the sciatic nerve. The white line indicates the crush site. (bar: upper =1000 $\mu$ m, lower=20 $\mu$ m)
- **b.** Neuron-like cells in the intact sciatic nerve of an adult rat. The nerve was hyalinized using ScaleS and stained for Stmn2 (red). The image shows neuron-like cells in the sciatic nerve. (bar: upper =1000 $\mu$ m, lower=20 $\mu$ m)
- **c.** Neuron-like cells labeled by AAV2/9 virus in vivo. NeuN and DAPI staining of virus-marked cells in vivo. Immunofluorescence staining for NeuN (red) and DAPI (gray) in GFP (green)-labeled cells in adult rat sciatic nerves 2 weeks after injection of AAV2/9 virus. (bar=50 $\mu$ m)

**a**

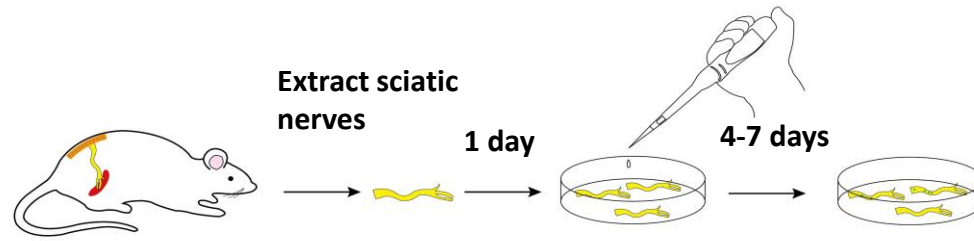

**b**

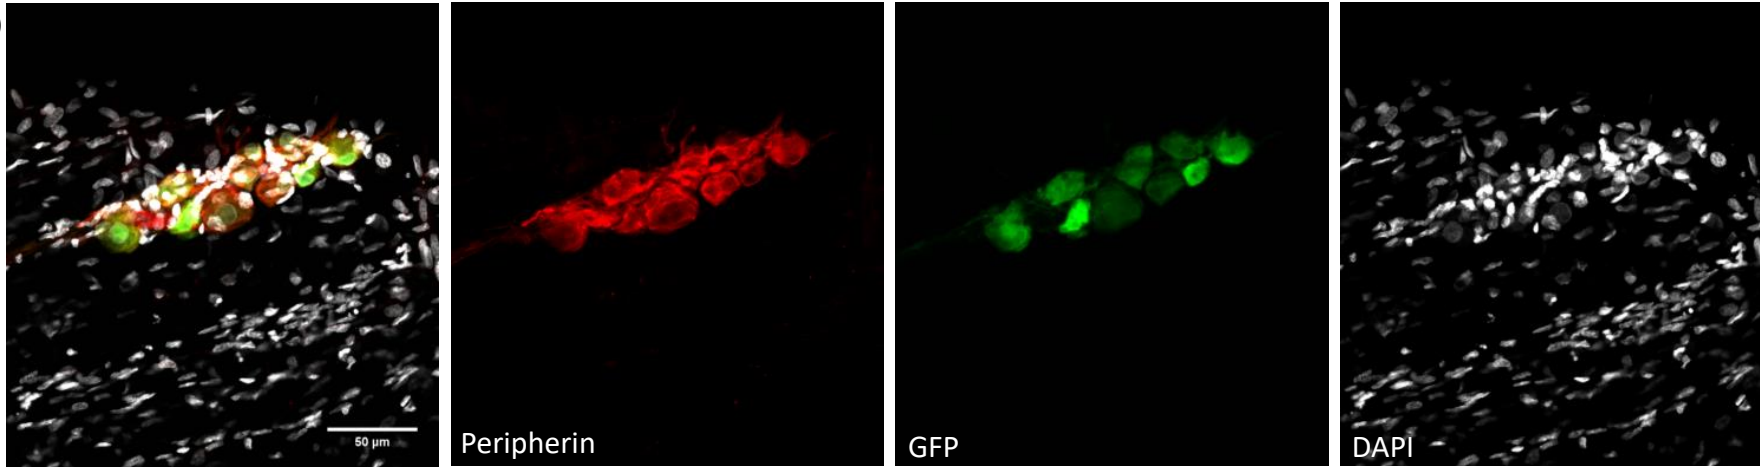

**c**

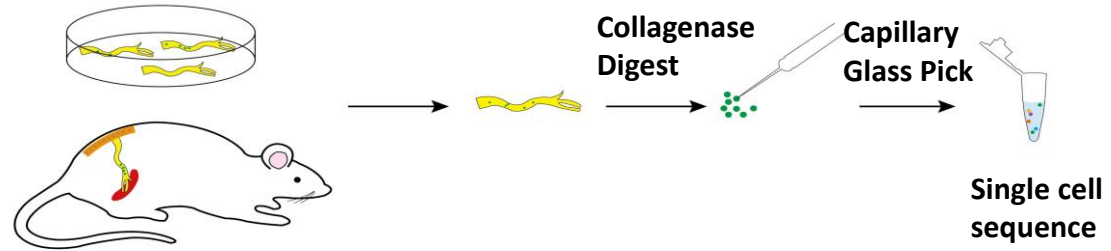



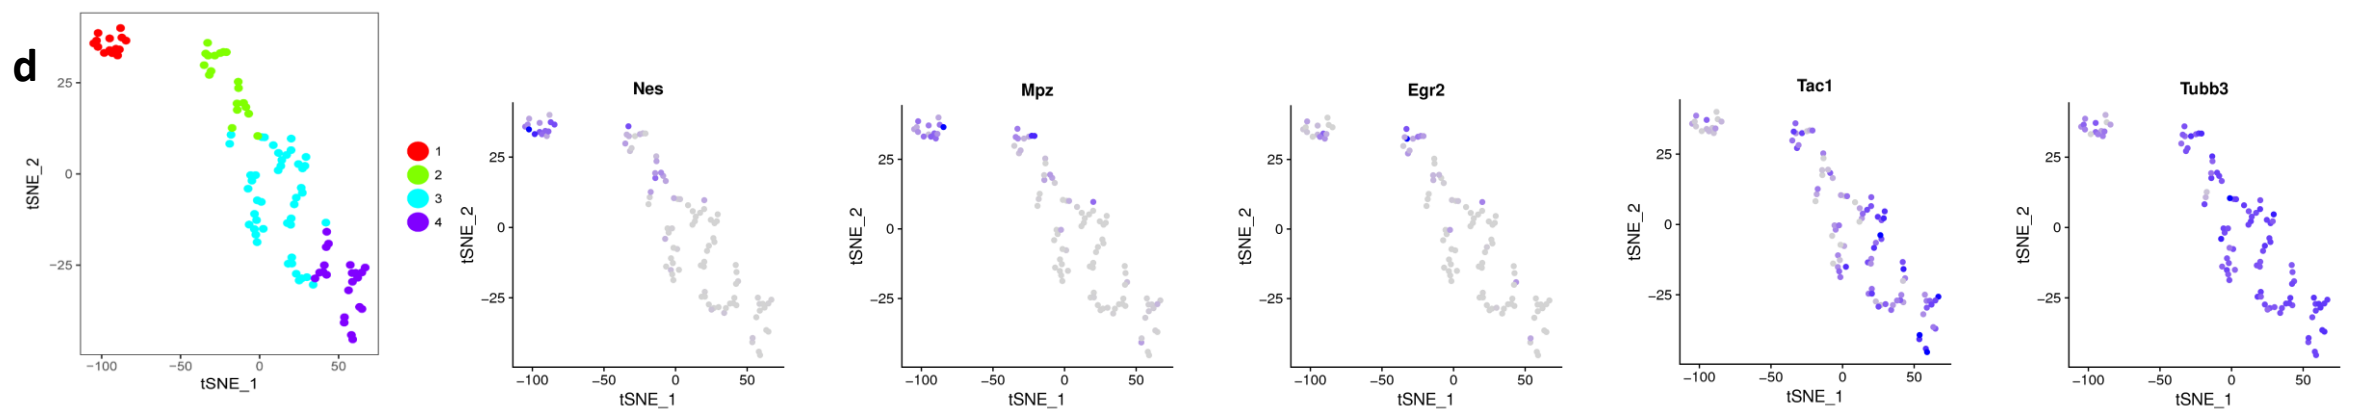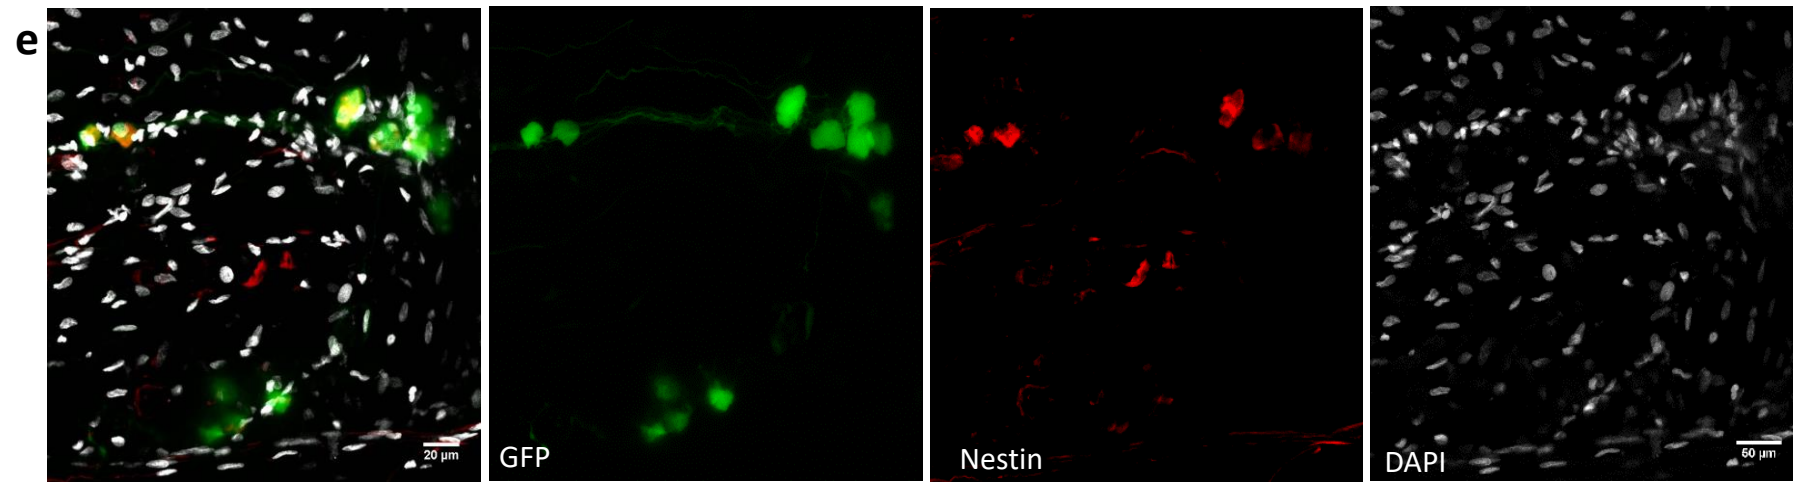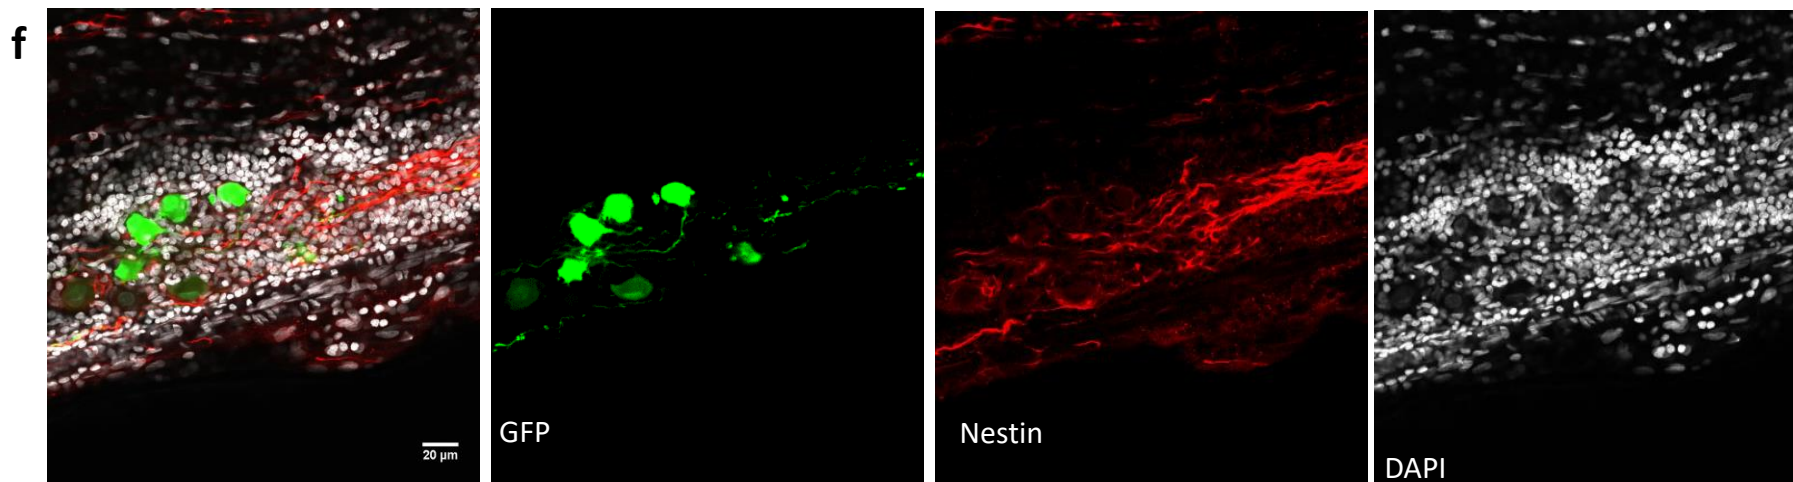

- **Fig. 2 | Neuronal stem cells in sciatic nerves of adult rats.**
- **a.** Sciatic nerve culture model. The sciatic nerves of adult rats were cultured in a defined serum-free medium.
- **b.** Peripherin staining of virus-labeled cells in vitro. Immunofluorescence staining for peripherin (red) and DAPI (gray) in GFP (green)-labeled cells was performed in cultured adult rat sciatic nerves 2 weeks after injection of the AAV2/9 virus. (bar=50 $\mu$ m)
- **c.** Model of single-cell sequencing of virus-labeled neuron-like cells.
- **d.** t-SNE map representing the subcluster analysis of the 100 GFP+ cells that expressed high levels of Stmn2. The four colors represent four different clusters. Expression profile of neural crest differentiation related genes in the t-SNE map. Blue gradient represents the level of gene expression.
- **e.** Stem cell marker of neuron-like cells in vitro. Immunofluorescence staining for Nestin (red) and DAPI (gray) was performed in cultured adult rat sciatic nerves 2 weeks after injection of AAV2/9 virus in vitro. (bar=20 $\mu$ m)
- **f.** As for (e), but in vivo, using adult rat sciatic nerves 2 weeks after injection of AAV2/9 virus. (bar=20 $\mu$ m)

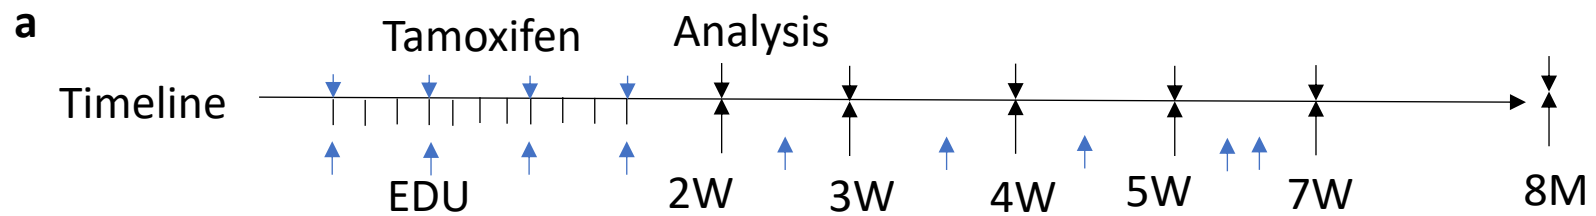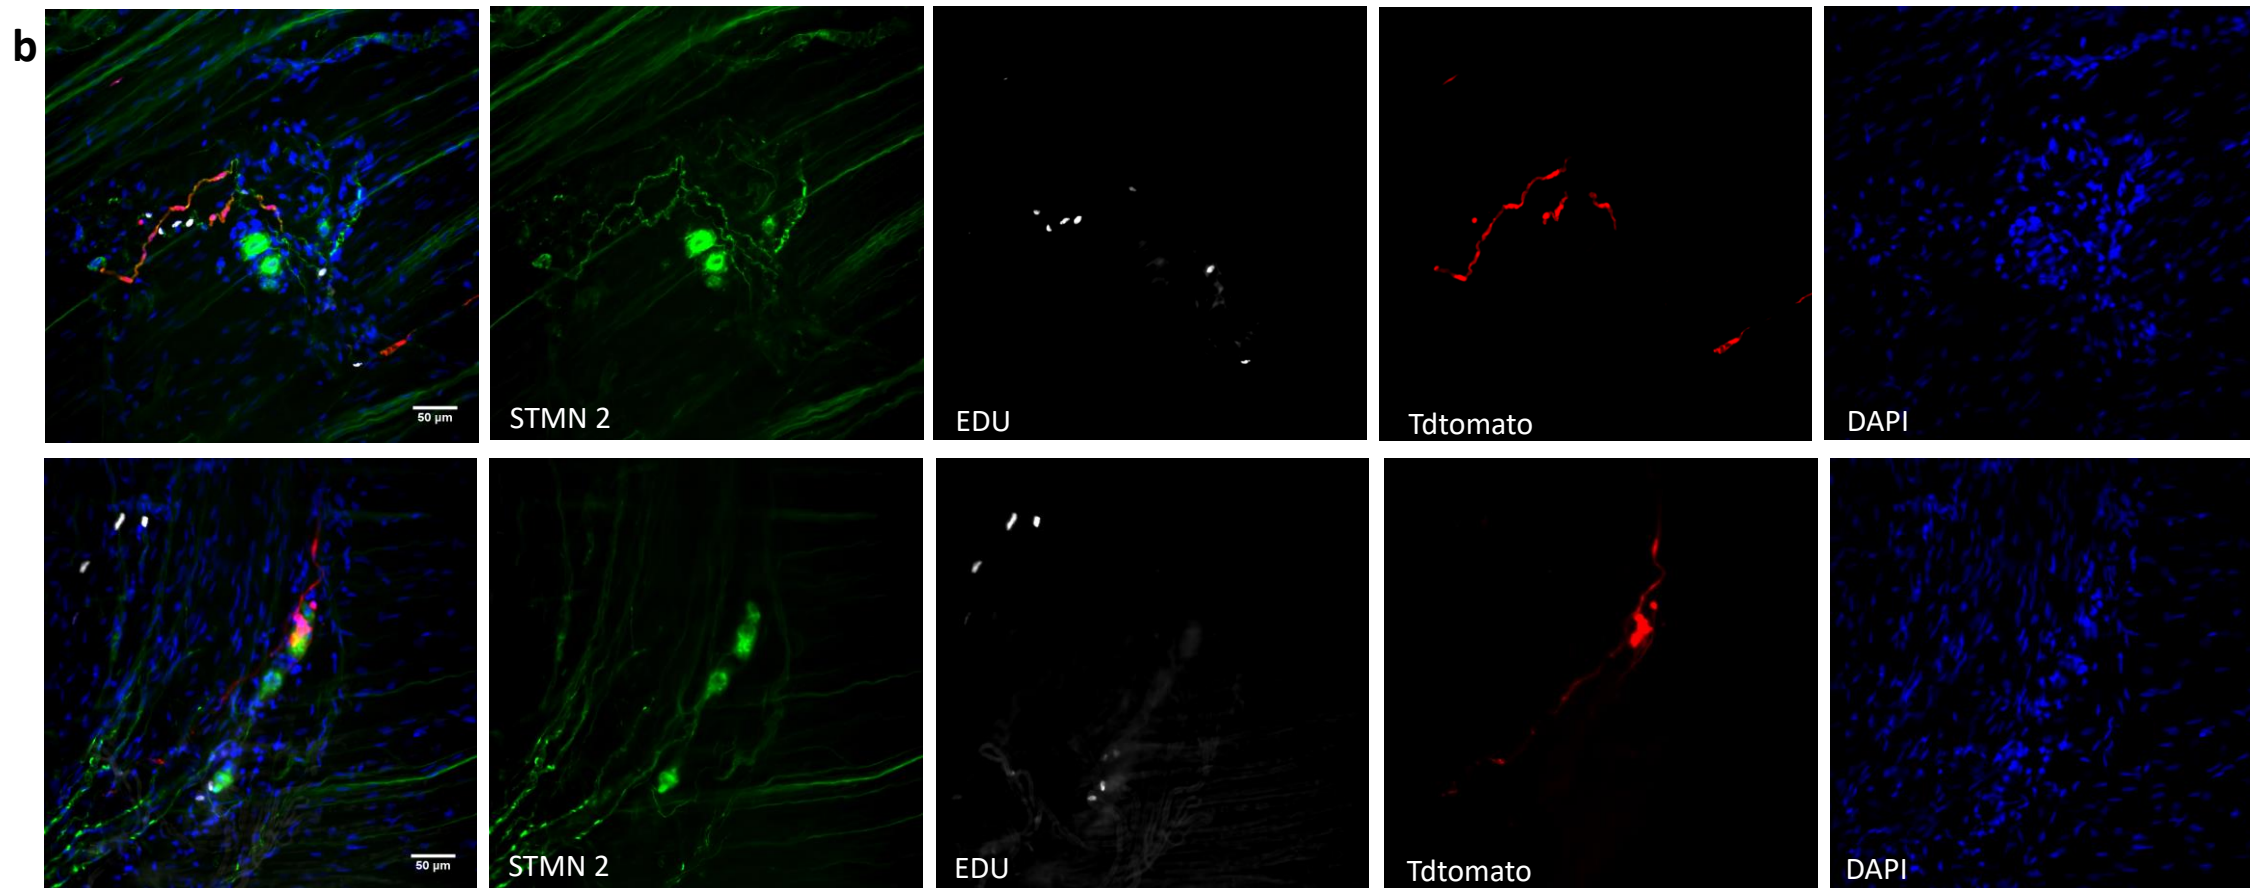

**c**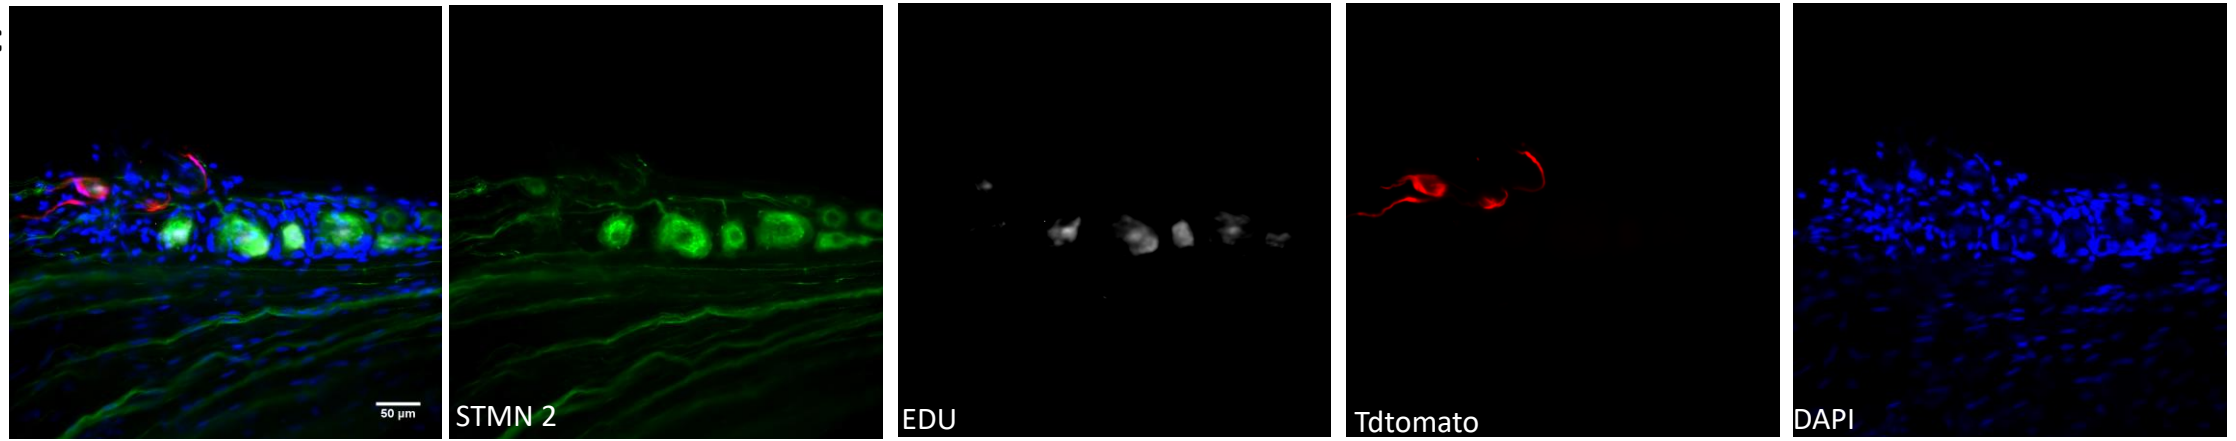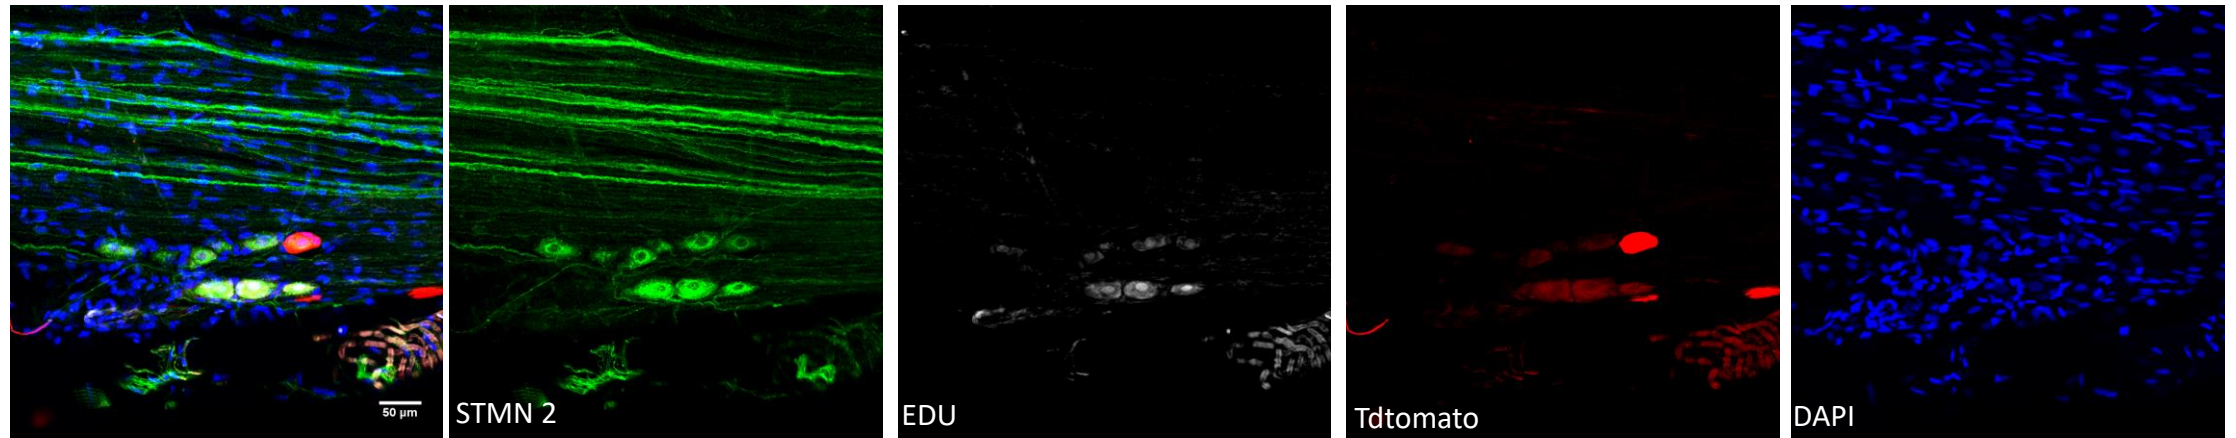**d**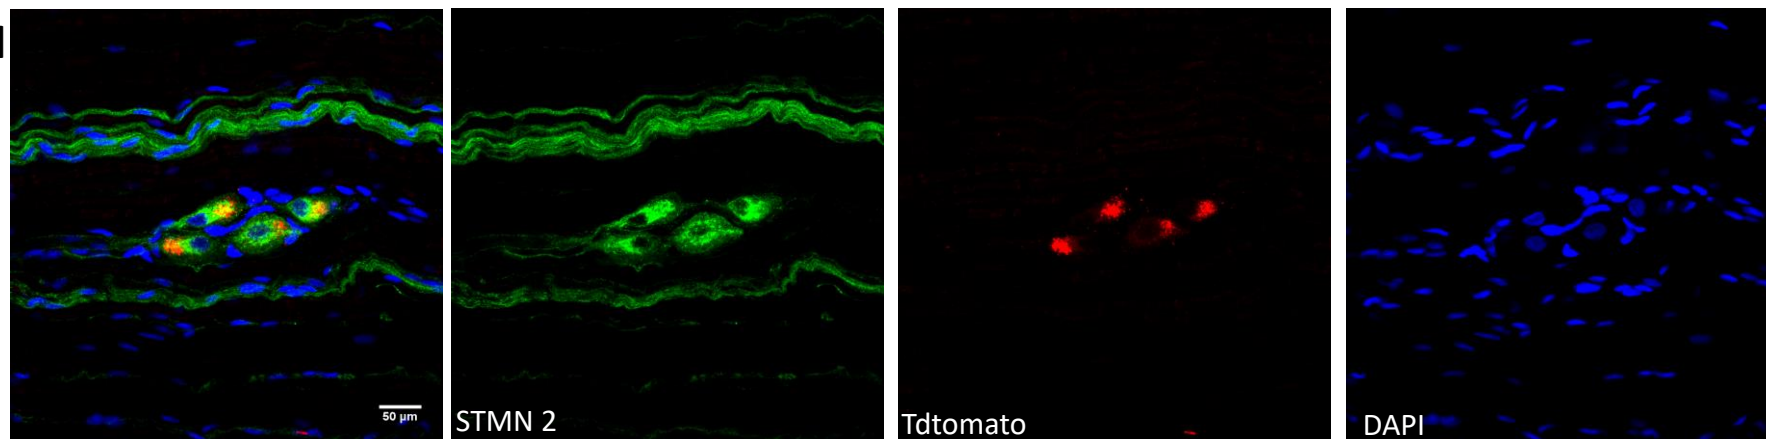

- **Fig. 3 | Neuronal stem cells gradually development in adult sciatic nerve.**
- **a.** Adult Nestin-CreER<sup>T2</sup>::Tdtomato rats were given injections of tamoxifen and EdU at different time points for clonal lineage-tracing analysis.
- **b.** Confocal images of stmn2-labeled cells at 2 or 3 weeks after tamoxifen injection, but cells were not co-labeled with Tdtomato and EdU. (bar=50μm)
- **c.** Confocal images of stmn2-labeled cells at 4 or 5 weeks after tamoxifen injection co-labeled with Tdtomato and EdU. (bar=50μm)
- **d.** Confocal images of stmn2-labeled cells at 8 months after tamoxifen injection co-labeled with Tdtomato . (bar=50μm)

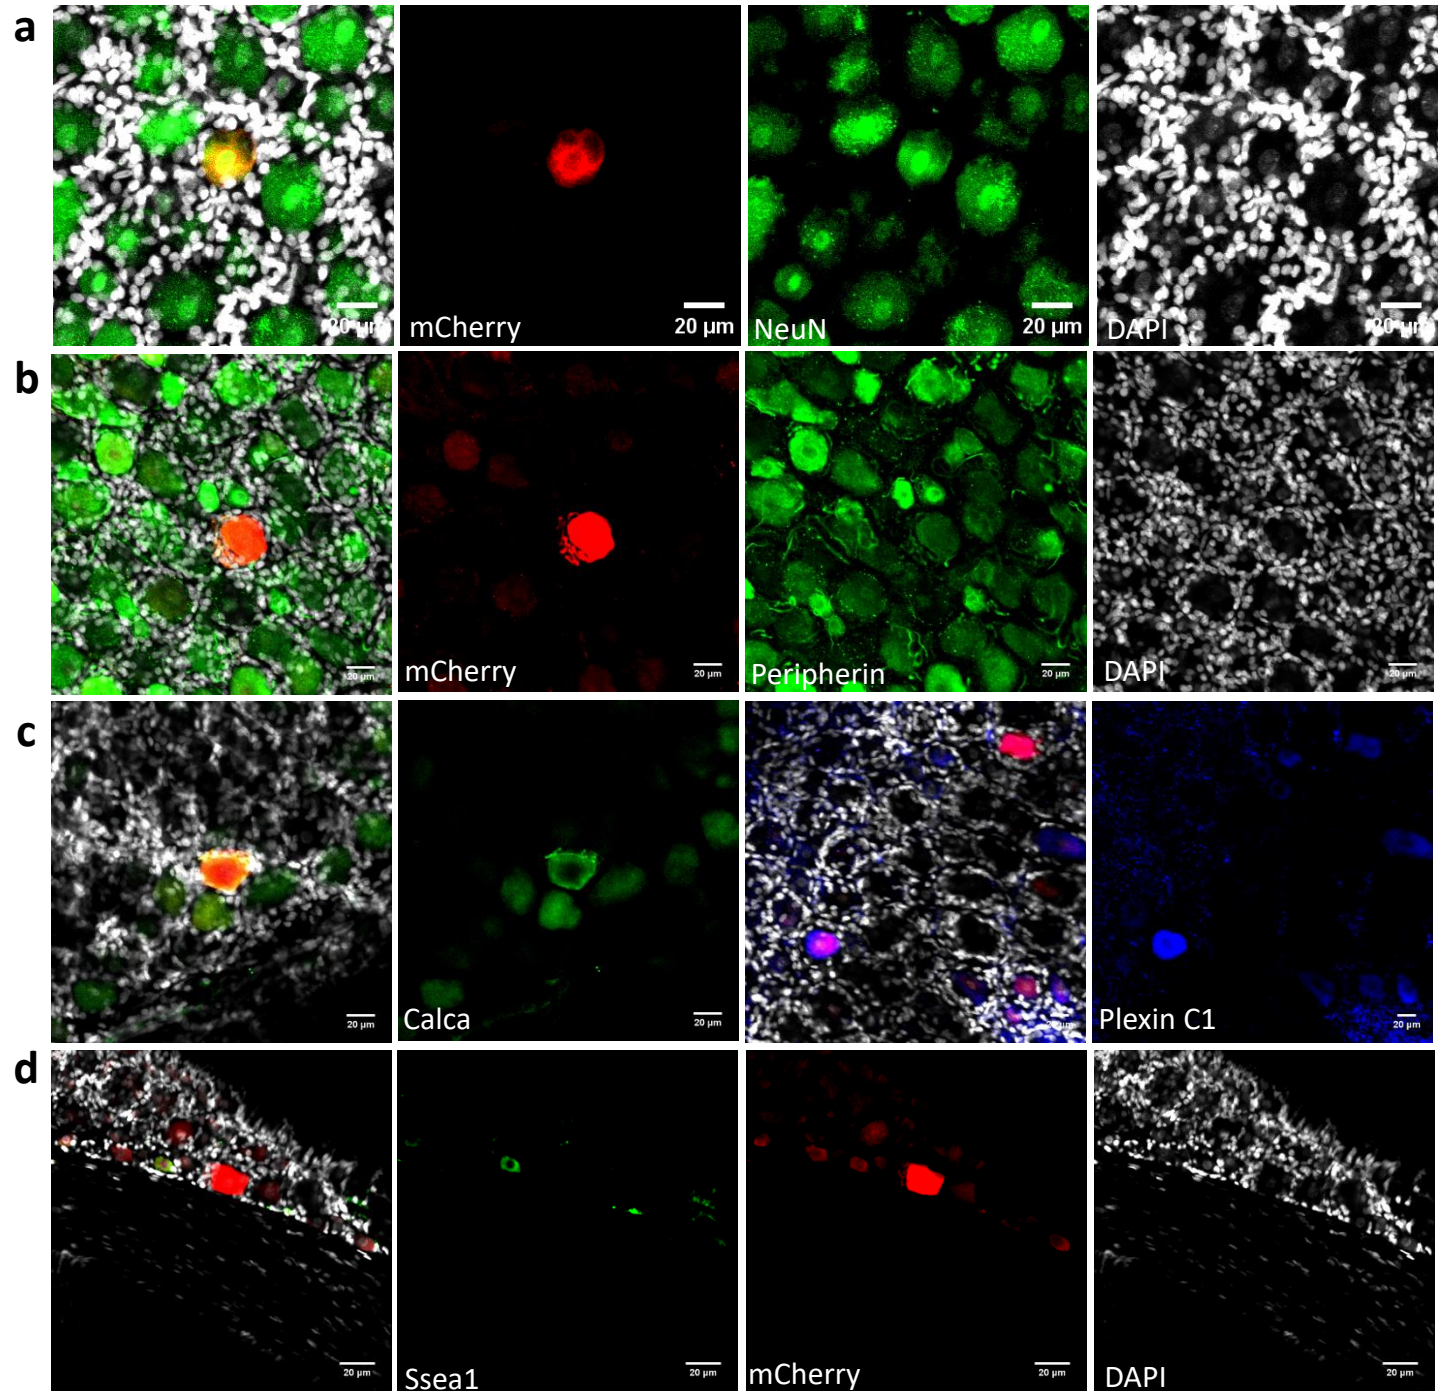

- **Fig. 4 | Distribution of newborn neurons from the sciatic nerve in the adult DRG.**
- **a.** mCherry<sup>+</sup> neurons in the DRG of Nestin-Cre<sup>+/+</sup> rats subjected to tail vein viral injection. Immunofluorescence staining for NeuN (green) and DAPI (gray) was performed in mCherry-marked cells (red) of the adult Nestin-Cre<sup>+/+</sup> rat DRG injected with AAV-PHP.S virus in vivo 3 weeks ago. (bar=20μm)
- **b.** As for (a), but for 7 weeks., using peripherin (green) and DAPI (gray) to stain DRG.(bar=20μm)
- **c.** mCherry-positive cells in the DRG. Immunofluorescence staining for DAPI (gray) and neuron-specific markers Calca (green) and Plexin C1 (blue) was performed in mCherry-labeled DRG cells (red) of the adult Nestin-Cre<sup>+/+</sup> rat after AAV-PHP.S virus injection in vivo. (bar=20μm)
- **d.** Stem cell markers of viral-labeled cells in the DRG of Nestin-Cre<sup>+/+</sup> rats. Immunofluorescence staining for Ssea1 (green) and DAPI (gray) was performed in mCherry-labeled DRG cells (red) of the adult Nestin-Cre<sup>+/+</sup> rat after AAV-PHP.S virus injection. (bar=20μm)

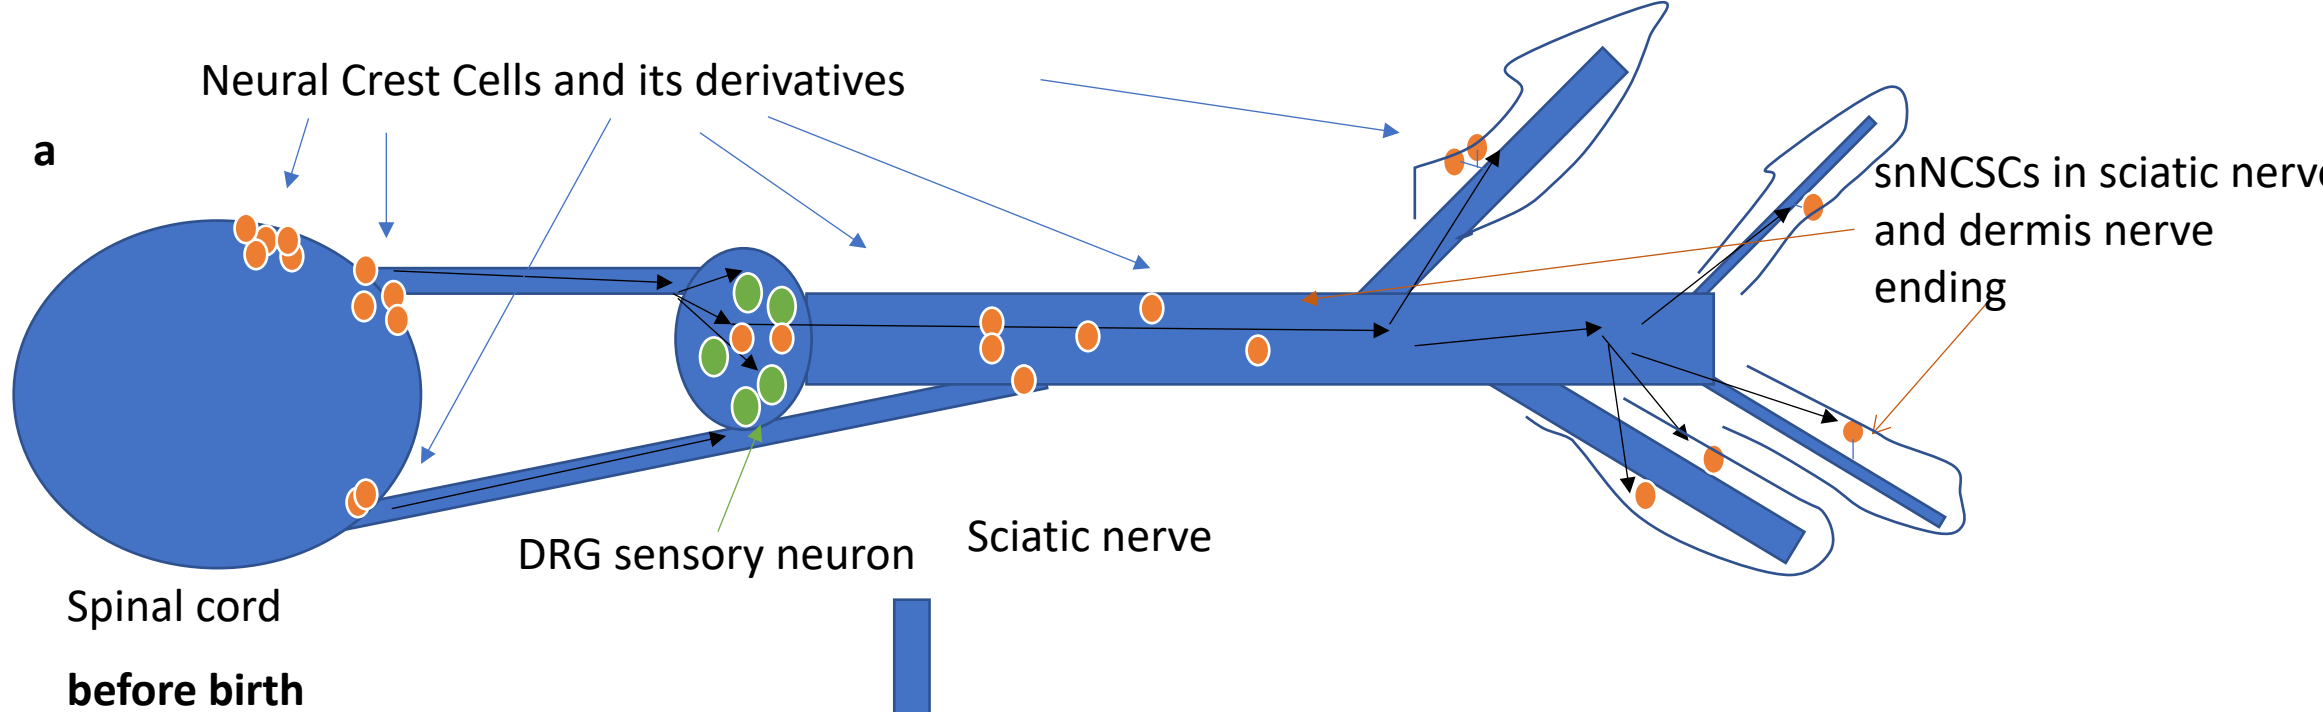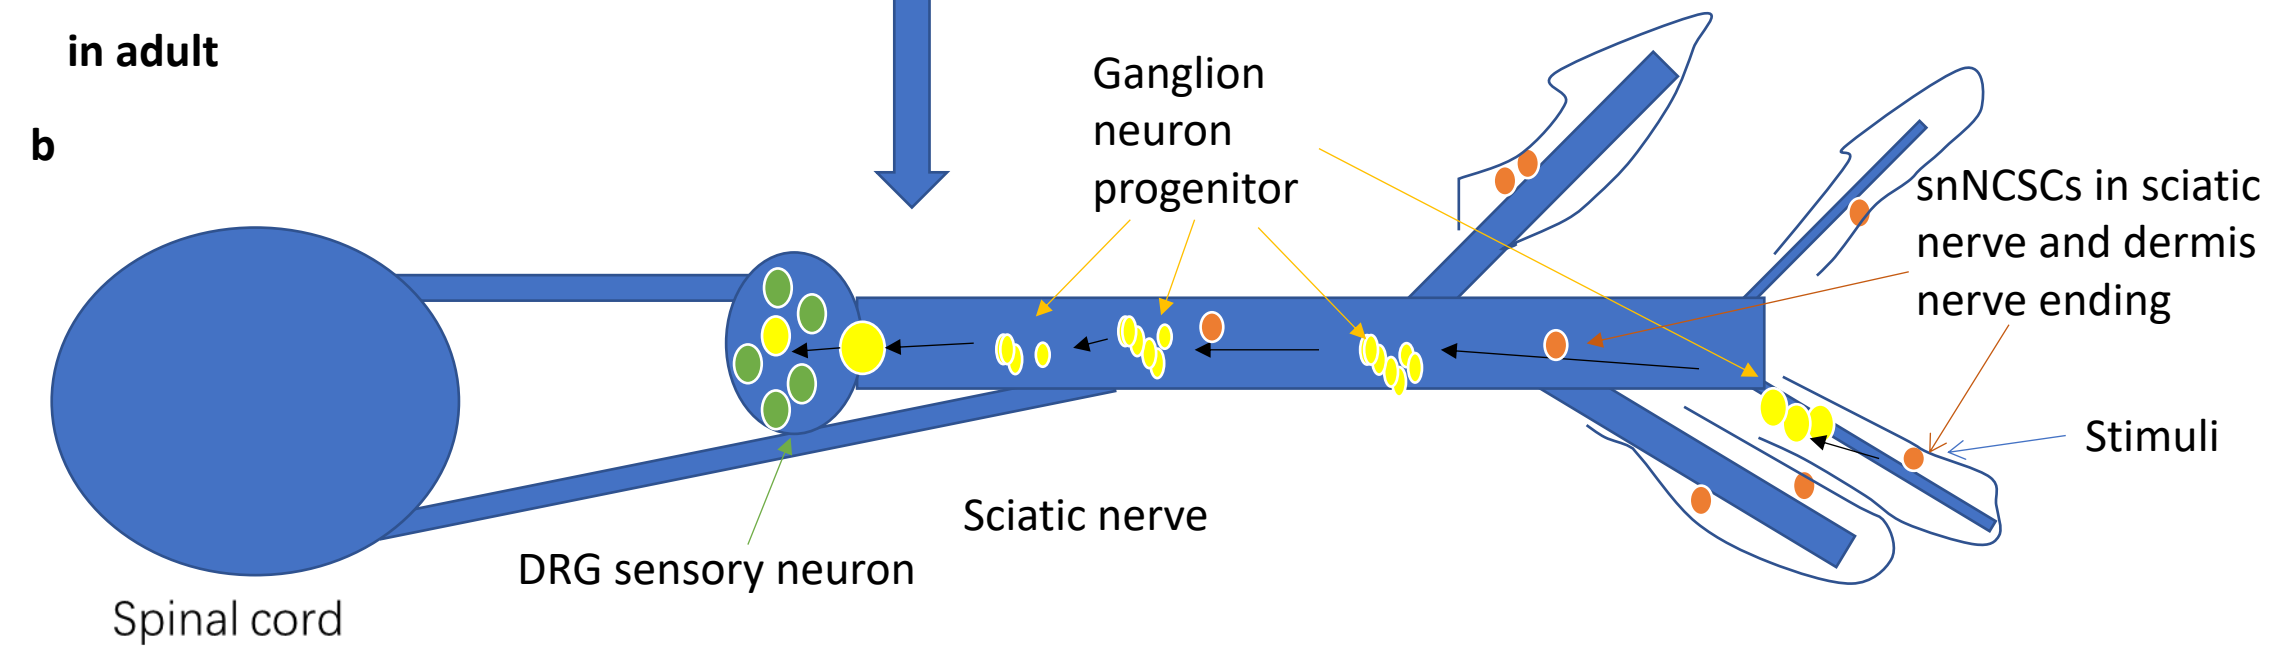



- **Fig. 5 | Hypothesis of adult neurogenesis in the sciatic nerve.**
- **a.** Neural crest cells migrate to the DRG and skin along the sciatic nerve before birth.
- **b.** snNCSCs in the dermis nerve ending and sciatic nerve mature in the sciatic nerve and migrate to the DRG in adults.
